# Supplementary material for: Exploring volatile organic compound emission from thermally modified wood by PTR-ToF-MS
Source: Royal Society of Chemistry journal article supplement (doi:10.1039/d2an01376b), 2022-01-01
Supplement: d2an01376b1.pdf [file d2an01376b1.pdf]

## SUPPLEMENTARY MATERIAL – SPME-GCMS ANALYSIS

### Analytical conditions

VOCs were extracted using Solid Phase Microextraction (SPME) with 1-cm fibre coated with 50/30- $\mu\text{m}$  divinyl benzene/carboxen/poly-dimethylsiloxane (DVB/CAR/PDMS). Three replicates of 0.5 grams of each sample were placed in a 20-ml screw-capped clear vial. The sample was incubated at 70°C for 20 minutes. The extraction time with SPME was set at 70°C for 40 minutes. After sampling, the fibre was immediately injected into the GC-MS injection port at 250°C for 5 minutes. VOCs were determined by gas chromatography/mass spectrometry (GC-MS). Analysis was carried out using Agilent Technologies 7820A/5977B Series MSD with Supelco SPB-624 (20 m x 0.18 mm ID x 1.0  $\mu\text{m}$  film thickness). The oven temperature was initially set at 40°C for 5 minutes, then increased to 100°C at a 4°C/min rate, increased to 220°C at a 6°C/min rate and maintained for 20 minutes. Helium was used as carrier gas at a flow rate 0.8 ml/min and the ion source temperature was set to 230°C. The mass analyser operated in scan mode in the range 25 – 300 m/z.

### Data processing

SPME-GCMS data processing was carried out using MS-DIAL software, which provides a complete workflow for mass spectral deconvolution, peak alignment, integration and annotation<sup>1,2</sup>. Peak annotation was performed against the NIST 14 mass spectral library. Matches with dot product/reverse dot product scores higher than 0.7 were retained.

### Mass peak annotation

The samples analysed by SPME-GCMS analysis were a subset of those analysed by PTR-ToF-MS and included both softwood (n = 19) and hardwood (n = 16). Mass peak annotation was carried out according to the following procedure:

- (1) Sum formula was estimated using measured exact mass from PTR-ToF-MS.
- (2) Using SPME-GCMS data, a list of candidate compounds was compiled having a sum formula matching the reagent ion sum formula from step (1).
- (3) Linear correlation was evaluated between PTR-ToF-MS mass peak and corresponding peak areas of candidate compound obtained from step (2).
- (4) Whenever possible, matching references were sought in the literature on wood and TMW VOC analysis.

---

<sup>1</sup> H. Tsugawa, T. Cajka, T. Kind, Y. Ma, B. Higgins, K. Ikeda, M. Kanazawa, J. VanderGheynst, O. Fiehn, M. Arita, MS-DIAL: data-independent MS/MS deconvolution for comprehensive metabolome analysis, *Nat Methods*. 12 (2015) 523–526. <https://doi.org/10.1038/nmeth.3393>.

<sup>2</sup> Z. Lai, H. Tsugawa, G. Wohlgemuth, S. Mehta, M. Mueller, Y. Zheng, A. Ogiwara, J. Meissen, M. Showalter, K. Takeuchi, T. Kind, P. Beal, M. Arita, O. Fiehn, Identifying metabolites by integrating metabolome databases with mass spectrometry cheminformatics, *Nat Methods*. 15 (2018) 53–56. <https://doi.org/10.1038/nmeth.4512>.

**Table S1.** List of PTR-ToF-MS mass peaks. A tentative identification is provided when possible.

| Measured mass (Th) | Theoretical mass (Th) | Sum formula                                                 | Tentative identification                    | Reference* | r <sup>†</sup> | p-value <sup>‡</sup> | chemical class |
|--------------------|-----------------------|-------------------------------------------------------------|---------------------------------------------|------------|----------------|----------------------|----------------|
| 31.018             | 31.018                | CH <sub>3</sub> O <sup>+</sup>                              | Formaldehyde                                | A          |                |                      | carbonyls      |
| 34.037             | 34.037                | <sup>13</sup> CH <sub>5</sub> O <sup>+</sup>                | Methanol                                    | A          |                |                      | alcohols       |
| 41.038             | 41.039                | C <sub>3</sub> H <sub>5</sub> <sup>+</sup>                  | Fragment                                    |            |                |                      | fragments      |
| 42.010             | not available         | not available                                               | Unknown                                     |            |                |                      | unknown        |
| 44.057             | 44.058                | <sup>13</sup> CC <sub>2</sub> H <sub>7</sub> <sup>+</sup>   | Fragment                                    |            |                |                      | fragments      |
| 46.036             | 46.037                | <sup>13</sup> CCH <sub>5</sub> O <sup>+</sup>               | Acetaldehyde                                | A          |                |                      | carbonyls      |
| 47.012             | 47.013                | CH <sub>3</sub> O <sub>2</sub> <sup>+</sup>                 | formic acid                                 | A          | 0.848          | <0.001               | acids          |
| 53.002             | not available         | not available                                               | Unknown                                     |            |                |                      | unknown        |
| 53.039             | 53.039                | C <sub>4</sub> H <sub>5</sub> <sup>+</sup>                  | Fragment                                    |            |                |                      | fragments      |
| 55.054             | 55.054                | C <sub>4</sub> H <sub>7</sub> <sup>+</sup>                  | Fragment                                    |            |                |                      | fragments      |
| 57.033             | 57.033                | C <sub>3</sub> H <sub>5</sub> O <sup>+</sup>                | Unknown                                     |            |                |                      | unknown        |
| 57.070             | 57.070                | C <sub>4</sub> H <sub>9</sub> <sup>+</sup>                  | Fragment                                    |            |                |                      | fragments      |
| 60.019             | 60.016                | <sup>13</sup> CCH <sub>3</sub> O <sub>2</sub> <sup>+</sup>  | Unknown                                     |            |                |                      | unknown        |
| 60.052             | 60.052                | <sup>13</sup> CC <sub>2</sub> H <sub>7</sub> O <sup>+</sup> | acetone/propanal ( <sup>13</sup> C isotope) | A          |                |                      | carbonyls      |
| 62.032             | 62.032                | <sup>13</sup> CCH <sub>5</sub> O <sub>2</sub> <sup>+</sup>  | acetic acid ( <sup>13</sup> C isotope)      | A,B,F,G    | 0.719          | 0.029                | acids          |
| 65.037             | 65.039                | C <sub>5</sub> H <sub>5</sub> <sup>+</sup>                  | fragment                                    |            |                |                      | fragments      |
| 65.058             | not available         | not available                                               | Unknown                                     |            |                |                      | unknown        |
| 67.023             | not available         | not available                                               | Unknown                                     |            |                |                      | unknown        |
| 69.033             | 69.033                | C <sub>4</sub> H <sub>5</sub> O <sup>+</sup>                | Furan                                       | H          | 0.767          | 0.005                | furans         |
| 69.069             | 69.070                | C <sub>5</sub> H <sub>9</sub> <sup>+</sup>                  | Fragment                                    |            |                |                      | unknown        |
| 71.048             | 71.049                | C <sub>4</sub> H <sub>7</sub> O <sup>+</sup>                | Unknown                                     |            |                |                      | unknown        |
| 71.085             | 71.086                | C <sub>5</sub> H <sub>11</sub> <sup>+</sup>                 | Fragment                                    |            |                |                      | unknown        |
| 73.028             | 73.028                | C <sub>3</sub> H <sub>5</sub> O <sub>2</sub> <sup>+</sup>   | Unknown                                     |            |                |                      | unknown        |

|         |               |                                                                          |                                                          |             |       |        |  |              |
|---------|---------------|--------------------------------------------------------------------------|----------------------------------------------------------|-------------|-------|--------|--|--------------|
| 73.064  | 73.065        | C <sub>4</sub> H <sub>9</sub> O <sup>+</sup>                             | Butanal                                                  | A           |       |        |  | carbonyls    |
| 74.034  | 74.032        | <sup>13</sup> CC <sub>2</sub> H <sub>5</sub> O <sub>2</sub> <sup>+</sup> | Unknown                                                  |             |       |        |  | unknown      |
| 75.995  | not available | not available                                                            | Unknown                                                  |             |       |        |  | unknown      |
| 76.047  | 76.047        | <sup>13</sup> CC <sub>2</sub> H <sub>7</sub> O <sub>2</sub> <sup>+</sup> | propanoic acid/methyl acetate ( <sup>13</sup> C isotope) | A,F         |       |        |  | acids/esters |
| 79.053  | 79.054        | C <sub>6</sub> H <sub>7</sub> <sup>+</sup>                               | Fragment                                                 |             |       |        |  | fragment     |
| 82.027  | not available | not available                                                            | Unknown                                                  |             |       |        |  | unknown      |
| 83.045  | 83.049        | C <sub>5</sub> H <sub>7</sub> O <sup>+</sup>                             | Unknown                                                  |             |       |        |  | unknown      |
| 83.085  | 83.086        | C <sub>6</sub> H <sub>11</sub> <sup>+</sup>                              | Fragment                                                 |             |       |        |  | fragments    |
| 85.028  | not available | not available                                                            | Unknown                                                  |             |       |        |  | unknown      |
| 85.064  | 85.065        | C <sub>5</sub> H <sub>9</sub> O <sup>+</sup>                             | Unknown                                                  |             |       |        |  | unknown      |
| 85.096  | not available | not available                                                            | Unknown                                                  |             |       |        |  | unknown      |
| 87.043  | 87.044        | C <sub>4</sub> H <sub>7</sub> O <sub>2</sub> <sup>+</sup>                | Diacetyl                                                 | G           |       |        |  | carbonyls    |
| 87.079  | 87.080        | C <sub>5</sub> H <sub>11</sub> O <sup>+</sup>                            | Pentanal                                                 | A           | 0.667 | 0.049  |  | carbonyls    |
| 89.059  | 89.060        | C <sub>4</sub> H <sub>9</sub> O <sub>2</sub> <sup>+</sup>                | methyl-propionate                                        | F,G         | 0.671 | 0.023  |  | esters       |
| 95.020  | not available | not available                                                            | unknown                                                  |             |       |        |  | unknown      |
| 95.044  | 95.049        | C <sub>6</sub> H <sub>7</sub> O <sup>+</sup>                             | phenol                                                   | A,E,F       |       |        |  | phenols      |
| 98.031  | 98.032        | <sup>13</sup> CC <sub>4</sub> H <sub>5</sub> O <sub>2</sub> <sup>+</sup> | furfural                                                 | A,B,C,D,E,F | 0.985 | <0.001 |  | furans       |
| 99.080  | 99.080        | C <sub>6</sub> H <sub>11</sub> O <sup>+</sup>                            | hexenal                                                  | A           |       |        |  | carbonyls    |
| 101.057 | 101.060       | C <sub>5</sub> H <sub>9</sub> O <sub>2</sub> <sup>+</sup>                | 2,3-Pentanedione                                         | E,F         |       |        |  | carbonyls    |
| 101.095 | 101.096       | C <sub>6</sub> H <sub>13</sub> O <sup>+</sup>                            | hexanal                                                  | A,B,F       | 0.691 | 0.039  |  | carbonyls    |
| 103.036 | 103.039       | C <sub>4</sub> H <sub>7</sub> O <sub>3</sub> <sup>+</sup>                | dihydro-hydroxyfuranone                                  | E,F         |       |        |  | furans       |
| 103.075 | 103.075       | C <sub>5</sub> H <sub>11</sub> O <sub>2</sub> <sup>+</sup>               | pentanoic acid/ethyl-propanoate                          | B,G         |       |        |  | acids/esters |
| 105.067 | 105.070       | C <sub>8</sub> H <sub>9</sub> <sup>+</sup>                               | unknown                                                  |             |       |        |  | unknown      |
| 107.047 | 107.049       | C <sub>7</sub> H <sub>7</sub> O <sup>+</sup>                             | benzaldehyde                                             | A,C,E,F     | 0.679 | 0.044  |  | carbonyls    |
| 107.085 | 107.086       | C <sub>8</sub> H <sub>11</sub> <sup>+</sup>                              | ethylbenzene                                             | F           |       |        |  | aromatics    |
| 109.061 | 109.065       | C <sub>7</sub> H <sub>9</sub> O <sup>+</sup>                             | methyl-phenol                                            | C           |       |        |  | phenols      |
| 109.101 | 109.101       | C <sub>8</sub> H <sub>13</sub> <sup>+</sup>                              | unknown                                                  |             |       |        |  | unknown      |

|         |               |                                                            |                                                                               |         |       |        |           |
|---------|---------------|------------------------------------------------------------|-------------------------------------------------------------------------------|---------|-------|--------|-----------|
| 111.043 | 111.044       | C <sub>6</sub> H <sub>7</sub> O <sub>2</sub> <sup>+</sup>  | methyl-furfural                                                               | E,F     | 0.965 | <0.001 | furans    |
| 111.075 | not available | not available                                              | unknown                                                                       |         |       |        | unknown   |
| 111.115 | 111.117       | C <sub>8</sub> H <sub>15</sub> <sup>+</sup>                | unknown                                                                       |         |       |        | unknown   |
| 113.059 | 113.060       | C <sub>6</sub> H <sub>9</sub> O <sub>2</sub> <sup>+</sup>  | 2-hydroxy-3-methyl-2-cyclopenten-1-one                                        | F,G     |       |        | carbonyls |
| 113.097 | 113.096       | C <sub>7</sub> H <sub>13</sub> O <sup>+</sup>              | 2-heptenal, (z)-                                                              | G       |       |        | carbonyls |
| 115.039 | 115.039       | C <sub>5</sub> H <sub>7</sub> O <sub>3</sub> <sup>+</sup>  | 4-hydroxy-5,6-dihydro-(2H)-pyran-2-one                                        | E,F     |       |        | carbonyls |
| 115.076 | 115.075       | C <sub>6</sub> H <sub>11</sub> O <sub>2</sub> <sup>+</sup> | 2,5-hexanedione                                                               |         |       |        | carbonyls |
| 115.112 | 115.112       | C <sub>7</sub> H <sub>15</sub> O <sup>+</sup>              | 2-heptanone                                                                   | A       | 0.610 | 0.046  | carbonyls |
| 117.055 | 117.055       | C <sub>5</sub> H <sub>9</sub> O <sub>3</sub> <sup>+</sup>  | acetol acetate                                                                | E,F     |       |        | carbonyls |
| 117.091 | 117.091       | C <sub>6</sub> H <sub>13</sub> O <sub>2</sub> <sup>+</sup> | hexanoic acid                                                                 | A,B,F   |       |        | acids     |
| 119.082 | 119.086       | C <sub>9</sub> H <sub>11</sub> <sup>+</sup>                | unknown                                                                       |         |       |        | unknown   |
| 121.049 | 121.050       | C <sub>4</sub> H <sub>9</sub> O <sub>4</sub> <sup>+</sup>  | methyl acetoxyacetate                                                         |         |       |        | esters    |
| 121.102 | 121.101       | C <sub>9</sub> H <sub>13</sub> <sup>+</sup>                | unknown                                                                       |         |       |        | unknown   |
| 123.044 | 123.044       | C <sub>7</sub> H <sub>7</sub> O <sub>2</sub> <sup>+</sup>  | Benzaldehyde, 2-hydroxy-                                                      | C       |       |        | carbonyls |
| 123.081 | 123.080       | C <sub>8</sub> H <sub>11</sub> O <sup>+</sup>              | Phenol, 2,3-dimethyl-                                                         | C       | 0.829 | 0.005  | phenols   |
| 123.117 | 123.117       | C <sub>9</sub> H <sub>15</sub> <sup>+</sup>                | unknown                                                                       |         |       |        | unknown   |
| 125.060 | 125.060       | C <sub>7</sub> H <sub>9</sub> O <sub>2</sub> <sup>+</sup>  | 1-Propanone, 1-(2-furanyl)-/2-Acetyl-5-methylfuran                            | C,E,F   | 0.815 | 0.002  | furans    |
| 125.097 | 125.096       | C <sub>8</sub> H <sub>13</sub> O <sup>+</sup>              | 4,5-dimethyl-2-ciclohexen-1-one                                               | E,F     |       |        | carbonyls |
| 125.133 | 125.132       | C <sub>9</sub> H <sub>17</sub> <sup>+</sup>                | unknown                                                                       |         |       |        | unknown   |
| 127.040 | 127.039       | C <sub>6</sub> H <sub>7</sub> O <sub>3</sub> <sup>+</sup>  | 3-Furancarboxylic acid, methyl ester/Methyl 2-furoate/5-Hydroxymethylfurfural | E,F,G   | 0.770 | 0.005  | furans    |
| 127.075 | 127.075       | C <sub>7</sub> H <sub>11</sub> O <sub>2</sub> <sup>+</sup> | 2-Cyclopenten-1-one, 3-ethyl-2-hydroxy-                                       | E,F     | 0.763 | 0.006  | carbonyls |
| 127.112 | 127.112       | C <sub>8</sub> H <sub>15</sub> O <sup>+</sup>              | 2-Octenal, (E)-                                                               | A,E,F,G | 0.767 | 0.005  | carbonyls |
| 129.092 | 129.091       | C <sub>7</sub> H <sub>13</sub> O <sub>2</sub> <sup>+</sup> | 3,6-Heptanedione                                                              |         | 0.615 | 0.043  | carbonyls |
| 129.128 | 129.127       | C <sub>8</sub> H <sub>17</sub> O <sup>+</sup>              | Octanal                                                                       | A       |       |        | carbonyls |
| 131.072 | 131.070       | C <sub>6</sub> H <sub>11</sub> O <sub>3</sub> <sup>+</sup> | 2-Butanone, 1-(acetyloxy)-                                                    | E,F     | 0.747 | 0.008  | carbonyls |
| 131.107 | 131.107       | C <sub>7</sub> H <sub>15</sub> O <sub>2</sub> <sup>+</sup> | heptanoic acid                                                                | B       |       |        | acids     |
| 135.053 | not available | not available                                              | unknown                                                                       |         |       |        | unknown   |

|         |               |                                                            |                                                                                                                                                                                                                             |         |       |        |           |
|---------|---------------|------------------------------------------------------------|-----------------------------------------------------------------------------------------------------------------------------------------------------------------------------------------------------------------------------|---------|-------|--------|-----------|
| 135.117 | 135.117       | C <sub>10</sub> H <sub>15</sub> <sup>+</sup>               | Bicyclo[3.1.0]hex-2-ene, 4-methylene-1-(1-methylethyl)- / p-Mentha-1,5,8-triene                                                                                                                                             | A       | 0.895 | 0.001  | terpenes  |
| 138.137 | 138.136       | <sup>13</sup> CC <sub>9</sub> H <sub>17</sub> <sup>+</sup> | alpha- and beta-pinene, camphene, D-limonene and delta-carene                                                                                                                                                               | A       | 0.684 | 0.042  | terpenes  |
| 139.114 | 139.112       | C <sub>9</sub> H <sub>15</sub> O <sup>+</sup>              | furan, 2-pentyl-                                                                                                                                                                                                            | A,G     | 0.816 | 0.002  | furans    |
| 141.127 | 141.127       | C <sub>9</sub> H <sub>17</sub> O <sup>+</sup>              | 2-Nonenal, (E)-                                                                                                                                                                                                             | A,E,F,G | 0.815 | 0.022  | carbonyls |
| 143.106 | 143.107       | C <sub>8</sub> H <sub>15</sub> O <sub>2</sub> <sup>+</sup> | unknown                                                                                                                                                                                                                     |         |       |        | unknown   |
| 143.143 | 143.143       | C <sub>9</sub> H <sub>19</sub> O <sup>+</sup>              | Nonanal                                                                                                                                                                                                                     | A,B     |       |        | carbonyls |
| 145.120 | 145.122       | C <sub>8</sub> H <sub>17</sub> O <sub>2</sub> <sup>+</sup> | Octanoic acid                                                                                                                                                                                                               | B       |       |        | acids     |
| 147.116 | not available | not available                                              | unknown                                                                                                                                                                                                                     |         |       |        | unknown   |
| 149.096 | 149.096       | C <sub>10</sub> H <sub>13</sub> O <sup>+</sup>             | Anethole/2-Butanone, 4-phenyl-                                                                                                                                                                                              | A       | 0.959 | <0.001 | carbonyls |
| 151.113 | 151.112       | C <sub>10</sub> H <sub>15</sub> O <sup>+</sup>             | Bicyclo[3.1.1]hept-3-en-2-one, 4,6,6-trimethyl-, (1S)-/2-Cyclohexen-1-one, 3-methyl-6-(1-methylethylidene)-                                                                                                                 |         | 0.872 | 0.002  | terpenes  |
| 153.128 | 153.127       | C <sub>10</sub> H <sub>17</sub> O <sup>+</sup>             | Camphenol, 6-/2-Cyclohexen-1-ol, 1-methyl-4-(1-methylethenyl)-, trans-/Carveol/cis-p-mentha-1(7),8-dien-2-ol                                                                                                                | B,G     | 0.945 | <0.001 | terpenes  |
| 155.106 | 155.107       | C <sub>9</sub> H <sub>15</sub> O <sub>2</sub> <sup>+</sup> | 3,5-dimethyl-2-hydroxy-2-ciclopenten-1-one                                                                                                                                                                                  | E,F     |       |        | carbonyls |
| 155.143 | 155.143       | C <sub>10</sub> H <sub>19</sub> O <sup>+</sup>             | Fenchol / Cyclohexanol,1-methyl-4-(1-methylethenyl)-/ Cyclopentanol, 1,2-dimethyl-3-(1-methylethenyl)- / Bicyclo[2.2.1]heptan-2-ol,2,3,3-trimethyl- / 3-Cyclohexen-1-ol, 4-methyl-1-(1-methylethyl)-,(R)- / alpha terpineol | A,B,G   | 0.928 | <0.001 | terpenes  |
| 157.089 | 157.086       | C <sub>8</sub> H <sub>13</sub> O <sub>3</sub> <sup>+</sup> | unknown                                                                                                                                                                                                                     |         |       |        | unknown   |
| 159.138 | 159.138       | C <sub>9</sub> H <sub>19</sub> O <sub>2</sub> <sup>+</sup> | Nonanoic acid                                                                                                                                                                                                               | B       |       |        | acids     |
| 161.129 | 161.132       | C <sub>12</sub> H <sub>17</sub> <sup>+</sup>               | unknown                                                                                                                                                                                                                     |         |       |        | unknown   |
| 163.148 | 163.148       | C <sub>12</sub> H <sub>19</sub> <sup>+</sup>               | unknown                                                                                                                                                                                                                     |         |       |        | unknown   |
| 175.147 | not available | not available                                              | unknown                                                                                                                                                                                                                     |         |       |        | unknown   |
| 179.145 | 179.143       | C <sub>12</sub> H <sub>19</sub> O <sup>+</sup>             | 5,5,8-Trimethyl-3,6,7-nonatrien-2-one                                                                                                                                                                                       |         |       |        | carbonyls |
| 191.180 | not available | not available                                              |                                                                                                                                                                                                                             |         |       |        | unknown   |
| 205.196 | 205.195       | C <sub>15</sub> H <sub>25</sub> <sup>+</sup>               | alpha-muurolene, beta-isocaryophyllene and longifolene                                                                                                                                                                      | A       | 0.856 | 0.003  | terpenes  |
| 217.196 | not available | not available                                              |                                                                                                                                                                                                                             |         |       |        | unknown   |

---

\* **References:** (A) J. Pohleven, M. Burnard, A. Kutnar, VOLATILE ORGANIC COMPOUNDS EMITTED FROM UNTREATED AND THERMALLY MODIFIED WOOD - A REVIEW, *WFS*. 51 (2019) 231–254. <https://doi.org/10.22382/wfs-2019-023>; (B) R. Liu, C. Wang, A. Huang, B. Lv, Characterization of Odors of Wood by Gas Chromatography-Olfactometry with Removal of Extractives as Attempt to Control Indoor Air Quality, *Molecules*. 23 (2018) 203. <https://doi.org/10.3390/molecules23010203>; (C) M. De Rosso, D. Cancian, A. Panighel, A. Dalla Vedova, R. Flamini, Chemical compounds released from five different woods used to make barrels for aging wines and spirits: volatile compounds and polyphenols, *Wood Sci Technol*. 43 (2009) 375–385. <https://doi.org/10.1007/s00226-008-0211-8>; (D) M.C. Díaz-Maroto, E. Sánchez-Palomo, M.S. Pérez-Coello, Fast Screening Method for Volatile Compounds of Oak Wood Used for Aging Wines by Headspace SPME-GC-MS (SIM), *J. Agric. Food Chem*. 52 (2004) 6857–6861. <https://doi.org/10.1021/jf049032m>; (E) B. Fernández de Simón, E. Esteruelas, Á.M. Muñoz, E. Cadahía, M. Sanz, Volatile Compounds in Acacia, Chestnut, Cherry, Ash, and Oak Woods, with a View to Their Use in Cooperage, *J. Agric. Food Chem*. 57 (2009) 3217–3227. <https://doi.org/10.1021/jf803463h>; (F) N. Natali, F. Chinnici, C. Riponi, Characterization of Volatiles in Extracts from Oak Chips Obtained by Accelerated Solvent Extraction (ASE), *J. Agric. Food Chem*. 54 (2006) 8190–8198. <https://doi.org/10.1021/jf0614387>; (G) L. Culleré, B. Fernández de Simón, E. Cadahía, V. Ferreira, P. Hernández-Orte, J. Cacho, Characterization by gas chromatography–olfactometry of the most odor-active compounds in extracts prepared from acacia, chestnut, cherry, ash and oak woods, *LWT - Food Science and Technology*. 53 (2013) 240–248. <https://doi.org/10.1016/j.lwt.2013.02.010>; (H) C.A.S. Hill, *Wood Modification Chemical, Thermal and Other Processes*, 2007. <https://nbn-resolving.org/urn:nbn:de:101:1-2015021011160> (accessed June 22, 2022).

† Pearson's correlation coefficient. When more than one candidate compound is available, correlation is computed using the sum of their peak areas.
