# Supplementary material for: Exploring volatile organic compound emission from thermally modified wood by PTR-ToF-MS
Source: Royal Society of Chemistry journal article supplement (doi:10.1039/d2an01376b), 2022-01-01
Supplement: d2an01376b2.xlsx [file d2an01376b2.xlsx]

## Sheet: table
Table S2. Effect of treatmentand tree species on VOC release. Peak areas are reported as median and interquartile range (IQR), within-species differences between treatments are assessed by one-way ANOVA and pairwise comparisons by Tukey’s HSD test (confidence level = 0.95).
mass peak	AR															PS															FG															FR
	NT		A		B		C		D		E		TV		p-value	NT		A		B		C		D		E		TV		p-value	NT		A		B		C		D		E		TV		p-value	NT		A
31.0178	1.06e+01(1.03e+01-1.08e+01)	a	5.46e+01(5.43e+01-5.93e+01)	d	1.64e+01(1.61e+01-1.65e+01)	a	3.51e+01(3.49e+01-3.57e+01)	bc	3.13e+01(3.01e+01-3.16e+01)	b	4.00e+01(3.86e+01-4.09e+01)	c	1.69e+01(1.68e+01-1.74e+01)	a	1.03e-11	1.08e+01(5.90e+00-1.68e+01)	a	8.63e+01(5.51e+01-1.16e+02)	b	2.89e+01(1.23e+01-4.78e+01)	a	2.43e+01(1.38e+01-3.35e+01)	a	1.49e+01(1.08e+01-2.18e+01)	a	4.09e+01(3.19e+01-5.04e+01)	a	4.68e+01(4.61e+01-5.01e+01)	ab	2.71e-07	1.79e+00(1.55e+00-1.92e+00)	a	2.09e+01(2.02e+01-2.09e+01)	c	1.62e+01(1.55e+01-1.62e+01)	b	1.46e+01(1.38e+01-1.53e+01)	b	1.53e+01(1.50e+01-1.61e+01)	b	2.01e+01(1.96e+01-2.04e+01)	c	1.93e+01(1.77e+01-1.95e+01)	bc	2.07e-10	4.03e+00(4.01e+00-4.04e+00)	a	4.59e+01(4.47e+01-4.70e+01)	e
34.037	3.96e+02(3.80e+02-4.34e+02)	a	6.59e+03(6.53e+03-6.96e+03)	d	7.78e+02(7.73e+02-8.53e+02)	a	2.88e+03(2.83e+03-3.04e+03)	bc	3.64e+03(3.53e+03-3.67e+03)	c	5.95e+03(5.85e+03-6.09e+03)	d	2.28e+03(2.20e+03-2.42e+03)	b	5.18e-14	6.44e+02(5.58e+02-8.38e+02)	a	9.96e+03(3.77e+03-1.73e+04)	b	6.59e+03(1.94e+03-1.14e+04)	ab	6.53e+03(3.38e+03-1.08e+04)	ab	2.36e+03(1.22e+03-3.74e+03)	ab	7.60e+03(2.67e+03-1.07e+04)	ab	8.41e+03(8.07e+03-9.07e+03)	ab	0.0104463	4.68e+02(4.14e+02-4.96e+02)	a	1.73e+03(1.61e+03-1.75e+03)	ab	1.29e+03(1.29e+03-1.34e+03)	ab	1.60e+03(1.52e+03-1.80e+03)	ab	2.79e+03(2.36e+03-3.01e+03)	bc	3.28e+03(3.28e+03-3.33e+03)	c	5.17e+03(4.56e+03-5.31e+03)	d	7.52e-08	4.23e+02(3.66e+02-4.32e+02)	a	6.00e+03(5.57e+03-6.11e+03)	e
41.0383	3.84e+01(3.82e+01-4.06e+01)	ab	5.98e+01(5.91e+01-6.67e+01)	b	1.77e+01(1.75e+01-1.95e+01)	a	1.06e+02(9.84e+01-1.07e+02)	c	1.29e+02(1.26e+02-1.30e+02)	c	9.69e+01(9.04e+01-1.09e+02)	c	3.64e+01(3.41e+01-3.85e+01)	ab	2.95e-09	2.97e+02(2.57e+02-3.25e+02)	ab	1.01e+03(1.94e+02-1.85e+03)	b	4.65e+02(1.70e+02-7.05e+02)	ab	2.01e+02(1.72e+02-2.32e+02)	ab	4.69e+01(1.60e+01-1.06e+02)	a	1.86e+02(7.19e+01-3.23e+02)	ab	3.27e+02(3.05e+02-3.70e+02)	ab	0.00544539	4.23e+00(3.92e+00-4.53e+00)	a	1.02e+01(1.02e+01-1.04e+01)	ab	2.18e+01(2.11e+01-2.26e+01)	d	2.07e+01(1.92e+01-2.31e+01)	cd	1.68e+01(1.44e+01-1.95e+01)	b d	1.26e+01(1.21e+01-1.26e+01)	abc	1.07e+01(8.88e+00-1.11e+01)	ab	8.02e-06	3.54e+00(3.20e+00-3.95e+00)	a	3.45e+01(3.22e+01-3.49e+01)	c
42.0099	3.98e-01(3.84e-01-4.27e-01)	a	4.69e-01(3.99e-01-4.83e-01)	a	2.23e-01(2.18e-01-2.52e-01)	a	1.07e+00(1.03e+00-1.19e+00)	c	7.52e-01(7.03e-01-7.53e-01)	b	8.00e-01(7.76e-01-8.05e-01)	b	3.22e-01(2.96e-01-3.34e-01)	a	1.53e-08	1.44e+00(9.04e-01-2.42e+00)	ab	4.78e+00(1.88e+00-8.21e+00)	b	2.71e+00(1.99e+00-3.47e+00)	ab	1.49e+00(1.26e+00-1.69e+00)	a	4.95e-01(3.23e-01-7.30e-01)	a	6.78e-01(5.52e-01-7.82e-01)	a	9.24e-01(9.06e-01-1.10e+00)	ab	0.000408651	3.76e-02(3.06e-02-3.77e-02)	a	5.02e-01(4.86e-01-5.21e-01)	ab	1.29e+00(1.24e+00-1.33e+00)	bc	1.41e+00(1.21e+00-1.81e+00)	c	8.96e-01(7.10e-01-1.14e+00)	a c	5.64e-01(5.27e-01-5.68e-01)	ab	1.60e-01(1.41e-01-1.61e-01)	a	8.72e-05	3.92e-02(2.94e-02-4.06e-02)	a	1.08e+00(9.29e-01-1.12e+00)	c
44.0571	2.99e+01(2.90e+01-3.09e+01)	a	5.53e+01(5.49e+01-5.87e+01)	ab	3.05e+01(2.96e+01-3.38e+01)	a	9.86e+01(9.48e+01-1.01e+02)	bc	1.01e+02(9.98e+01-1.02e+02)	bc	9.86e+01(9.02e+01-1.21e+02)	c	4.10e+01(3.98e+01-4.50e+01)	a	2.38e-06	1.96e+02(1.36e+02-2.85e+02)	ab	1.10e+03(1.84e+02-2.07e+03)	b	4.71e+02(1.15e+02-7.98e+02)	ab	2.26e+02(1.72e+02-3.01e+02)	ab	7.02e+01(2.78e+01-1.45e+02)	a	2.69e+02(7.59e+01-4.76e+02)	ab	4.30e+02(3.93e+02-4.93e+02)	ab	0.0114216	7.39e+00(6.68e+00-8.09e+00)	a	2.60e+01(2.42e+01-2.71e+01)	a	7.41e+01(7.27e+01-7.89e+01)	b	7.61e+01(6.66e+01-9.23e+01)	b	5.67e+01(4.26e+01-6.39e+01)	ab	2.85e+01(2.69e+01-3.12e+01)	a	1.68e+01(1.37e+01-1.70e+01)	a	2.61e-05	7.35e+00(5.65e+00-7.56e+00)	a	6.01e+01(5.41e+01-6.15e+01)	c
46.0364	1.45e+02(1.41e+02-1.54e+02)	a	1.75e+03(1.72e+03-1.95e+03)	c	2.43e+02(2.34e+02-2.85e+02)	a	1.64e+03(1.62e+03-1.73e+03)	c	2.02e+03(1.90e+03-2.05e+03)	c	3.16e+03(3.08e+03-3.33e+03)	d	8.83e+02(8.27e+02-9.14e+02)	b	1.22e-11	2.31e+02(2.16e+02-2.42e+02)	a	2.74e+03(1.28e+03-4.14e+03)	b	1.81e+03(5.31e+02-3.04e+03)	ab	1.38e+03(9.77e+02-1.94e+03)	ab	6.72e+02(4.56e+02-1.10e+03)	ab	1.49e+03(1.31e+03-2.50e+03)	ab	2.63e+03(2.51e+03-2.93e+03)	ab	0.000968478	1.20e+02(1.10e+02-1.23e+02)	a	7.03e+02(5.97e+02-7.09e+02)	bc	6.47e+02(6.37e+02-6.76e+02)	bc	5.53e+02(5.08e+02-6.11e+02)	b	6.94e+02(5.88e+02-7.67e+02)	bc	6.57e+02(6.25e+02-6.74e+02)	bc	1.12e+03(9.44e+02-1.13e+03)	c	4.33e-05	8.19e+01(7.82e+01-8.63e+01)	a	3.04e+03(2.75e+03-3.14e+03)	d
47.0121	1.71e+02(1.61e+02-1.90e+02)	a	1.30e+03(1.29e+03-1.37e+03)	c	8.75e+02(8.71e+02-9.37e+02)	b	1.40e+03(1.40e+03-1.50e+03)	c	1.03e+03(1.01e+03-1.04e+03)	b	8.89e+02(8.87e+02-9.17e+02)	b	1.29e+02(1.20e+02-1.48e+02)	a	1.29e-12	2.93e+02(1.82e+02-4.10e+02)	a	1.13e+03(1.03e+03-1.21e+03)	bc	1.11e+03(8.17e+02-1.42e+03)	bc	1.18e+03(1.05e+03-1.29e+03)	bc	7.99e+02(6.04e+02-9.18e+02)	b	1.29e+03(1.11e+03-1.49e+03)	c	1.55e+02(1.38e+02-1.58e+02)	a	1.64e-09	1.75e+02(1.50e+02-2.21e+02)	a	4.79e+02(4.52e+02-4.96e+02)	b	9.36e+02(9.33e+02-9.82e+02)	c	1.12e+03(1.11e+03-1.23e+03)	c	5.02e+02(4.73e+02-5.27e+02)	b	6.52e+02(6.36e+02-6.61e+02)	b	1.21e+02(9.14e+01-1.21e+02)	a	9.86e-11	2.17e+02(1.49e+02-2.20e+02)	a	7.41e+02(7.34e+02-7.61e+02)	bc
53.0021	1.18e+00(1.10e+00-1.21e+00)	cd	3.77e-01(3.63e-01-4.35e-01)	ab	1.62e-01(1.55e-01-1.92e-01)	a	1.59e+00(1.35e+00-1.72e+00)	d	7.41e-01(7.20e-01-7.70e-01)	bc	6.90e-01(6.43e-01-7.51e-01)	a c	6.56e-01(6.44e-01-7.06e-01)	a c	1.7e-06	8.10e+00(2.98e+00-1.26e+01)	ab	2.44e+01(5.07e+00-4.93e+01)	b	9.23e+00(6.37e+00-1.11e+01)	ab	2.32e+00(1.46e+00-5.01e+00)	a	4.94e-01(1.39e-01-9.60e-01)	a	5.47e-01(5.22e-01-6.15e-01)	a	2.38e+00(2.18e+00-2.73e+00)	ab	0.00135939	9.60e-03(4.80e-03-1.57e-02)	a	1.61e-01(1.57e-01-1.75e-01)	a c	3.27e-01(3.04e-01-3.33e-01)	bc	3.16e-01(2.68e-01-4.01e-01)	c	1.55e-01(1.48e-01-1.79e-01)	a c	1.28e-01(1.23e-01-1.34e-01)	ab	8.75e-02(7.69e-02-1.04e-01)	a	4.07e-05	1.08e-02(8.40e-03-2.27e-02)	a	4.63e-01(4.62e-01-5.24e-01)	f
53.0385	9.70e+00(9.45e+00-1.06e+01)	b	2.23e+00(2.16e+00-2.41e+00)	a	2.06e+00(2.02e+00-2.24e+00)	a	9.70e+00(8.36e+00-1.15e+01)	b	4.36e+00(4.24e+00-4.43e+00)	a	3.66e+00(3.59e+00-3.81e+00)	a	4.52e+00(4.32e+00-4.89e+00)	a	4.43e-06	9.14e+01(4.08e+01-1.51e+02)	ab	1.78e+02(3.68e+01-3.15e+02)	b	7.30e+01(6.06e+01-8.41e+01)	ab	2.62e+01(1.21e+01-5.19e+01)	ab	3.21e+00(1.67e+00-5.35e+00)	a	4.57e+00(3.87e+00-7.23e+00)	a	7.59e+00(7.33e+00-8.57e+00)	ab	0.00163936	2.64e-01(2.39e-01-2.83e-01)	a	6.90e-01(6.87e-01-7.07e-01)	a	2.31e+00(2.30e+00-2.43e+00)	bc	3.22e+00(2.90e+00-3.74e+00)	c	1.12e+00(9.29e-01-1.36e+00)	ab	1.37e+00(1.34e+00-1.39e+00)	ab	1.03e+00(8.67e-01-1.13e+00)	a	1.4e-06	1.99e-01(1.56e-01-2.01e-01)	a	2.35e+00(2.24e+00-2.42e+00)	cd
55.0536	3.84e+01(3.64e+01-4.15e+01)	a	1.64e+02(1.62e+02-1.88e+02)	b	2.04e+01(2.03e+01-2.32e+01)	a	2.81e+02(2.79e+02-3.10e+02)	c	4.24e+02(4.14e+02-4.31e+02)	d	2.19e+02(2.15e+02-2.29e+02)	b	3.51e+01(3.41e+01-3.74e+01)	a	1.44e-12	2.37e+02(1.47e+02-5.43e+02)	a	2.43e+03(4.25e+02-4.78e+03)	a	1.27e+03(9.79e+01-2.52e+03)	a	4.58e+02(1.02e+02-8.58e+02)	a	1.47e+02(2.91e+01-3.49e+02)	a	4.20e+02(3.83e+02-6.71e+02)	a	9.26e+02(8.88e+02-1.03e+03)	a	0.012309	2.23e+01(1.86e+01-2.93e+01)	ab	1.01e+01(9.92e+00-1.09e+01)	a	3.12e+01(3.06e+01-3.33e+01)	b	1.53e+01(1.47e+01-1.67e+01)	ab	1.88e+01(1.54e+01-2.16e+01)	ab	9.81e+00(9.54e+00-1.01e+01)	a	8.09e+00(6.91e+00-8.79e+00)	a	0.000305752	1.54e+01(1.22e+01-1.63e+01)	ab	5.35e+01(5.00e+01-5.46e+01)	e
57.0331	2.35e+01(2.21e+01-2.46e+01)	a	5.15e+01(5.10e+01-5.81e+01)	b	3.02e+01(2.89e+01-3.17e+01)	a	6.42e+01(6.23e+01-7.23e+01)	b	5.88e+01(5.81e+01-6.01e+01)	b	5.86e+01(5.82e+01-6.01e+01)	b	2.12e+01(2.01e+01-2.25e+01)	a	5.39e-08	5.31e+01(2.92e+01-6.37e+01)	a	1.96e+02(8.73e+01-3.41e+02)	b	1.27e+02(5.71e+01-2.00e+02)	ab	1.07e+02(8.39e+01-1.34e+02)	ab	5.37e+01(3.74e+01-6.88e+01)	a	6.36e+01(5.58e+01-8.12e+01)	ab	7.24e+01(6.93e+01-8.14e+01)	ab	0.00417905	3.21e+00(3.00e+00-3.50e+00)	a	2.01e+01(1.92e+01-2.08e+01)	ab	6.55e+01(6.30e+01-6.81e+01)	c	7.44e+01(6.69e+01-9.05e+01)	c	6.12e+01(4.80e+01-7.15e+01)	bc	3.64e+01(3.58e+01-3.69e+01)	a c	9.95e+00(8.86e+00-1.04e+01)	a	1.59e-05	5.00e+00(3.98e+00-5.27e+00)	a	4.55e+01(4.26e+01-4.59e+01)	b
57.0695	5.73e+01(5.64e+01-6.20e+01)	b	3.54e+01(3.50e+01-3.83e+01)	ab	1.16e+01(1.15e+01-1.27e+01)	a	5.75e+01(5.08e+01-6.57e+01)	b	6.20e+01(6.20e+01-6.24e+01)	b	6.27e+01(5.49e+01-7.39e+01)	b	3.38e+01(3.23e+01-3.60e+01)	ab	6.64e-05	4.80e+02(3.05e+02-6.77e+02)	ab	7.81e+02(2.10e+02-1.34e+03)	b	3.89e+02(2.90e+02-4.24e+02)	ab	1.15e+02(5.98e+01-2.61e+02)	a	1.55e+01(1.08e+01-3.07e+01)	a	5.30e+01(2.71e+01-8.97e+01)	a	8.19e+01(7.34e+01-9.04e+01)	ab	0.000516777	4.54e+00(4.49e+00-5.22e+00)	a	6.56e+00(6.44e+00-7.23e+00)	ab	1.19e+01(1.15e+01-1.26e+01)	b	1.12e+01(1.08e+01-1.20e+01)	ab	1.14e+01(9.43e+00-1.35e+01)	ab	6.34e+00(6.11e+00-6.76e+00)	ab	7.92e+00(6.29e+00-8.10e+00)	ab	0.00110226	4.45e+00(3.96e+00-5.23e+00)	a	1.75e+01(1.61e+01-1.75e+01)	cd
60.019	7.32e-02(6.68e-02-7.72e-02)	a	1.84e+00(1.79e+00-2.11e+00)	c	2.98e-01(2.93e-01-3.01e-01)	a	1.43e+00(1.42e+00-1.54e+00)	bc	1.33e+00(1.26e+00-1.34e+00)	b	1.76e+00(1.72e+00-1.92e+00)	bc	2.93e-01(2.75e-01-3.36e-01)	a	1.6e-09	1.37e-01(7.07e-02-1.82e-01)	a	3.04e+00(1.15e+00-5.63e+00)	b	2.01e+00(8.38e-01-3.35e+00)	ab	1.77e+00(1.61e+00-2.07e+00)	ab	1.01e+00(6.37e-01-1.51e+00)	ab	1.34e+00(1.12e+00-3.30e+00)	ab	1.69e+00(1.69e+00-1.98e+00)	ab	0.0191199	5.21e-02(5.20e-02-5.74e-02)	a	1.35e+00(1.30e+00-1.41e+00)	a c	2.35e+00(2.29e+00-2.54e+00)	c	2.44e+00(2.10e+00-2.94e+00)	c	1.54e+00(1.41e+00-1.87e+00)	bc	1.01e+00(9.60e-01-1.03e+00)	ab	3.67e-01(3.16e-01-3.87e-01)	ab	5.79e-06	3.94e-02(3.19e-02-4.03e-02)	a	3.18e+00(2.86e+00-3.37e+00)	d
60.0523	2.10e+02(2.07e+02-2.32e+02)	a	1.16e+03(1.14e+03-1.33e+03)	b	2.63e+02(2.47e+02-3.03e+02)	a	1.47e+03(1.43e+03-1.58e+03)	bc	1.78e+03(1.70e+03-1.82e+03)	cd	2.01e+03(1.97e+03-2.12e+03)	d	4.80e+02(4.60e+02-5.23e+02)	a	7.82e-11	4.21e+02(2.79e+02-4.85e+02)	a	1.48e+04(1.69e+03-2.79e+04)	a	6.51e+03(1.18e+03-1.23e+04)	a	3.69e+03(1.90e+03-5.31e+03)	a	2.24e+03(4.29e+02-4.36e+03)	a	5.35e+03(1.51e+03-9.54e+03)	a	8.46e+03(8.22e+03-9.89e+03)	a	0.0191303	2.86e+01(2.72e+01-3.15e+01)	a	3.50e+02(3.19e+02-3.60e+02)	bc	6.39e+02(6.14e+02-6.60e+02)	d	3.54e+02(3.30e+02-4.05e+02)	b d	5.95e+02(5.01e+02-6.94e+02)	cd	3.55e+02(3.36e+02-3.60e+02)	b d	2.55e+02(2.16e+02-2.57e+02)	ab	7.04e-06	2.20e+01(1.94e+01-2.37e+01)	a	1.55e+03(1.41e+03-1.59e+03)	e
62.0317	5.52e+02(4.69e+02-7.37e+02)	a	1.18e+04(1.17e+04-1.28e+04)	cd	6.05e+03(5.76e+03-6.06e+03)	b	1.21e+04(1.19e+04-1.31e+04)	d	9.80e+03(9.63e+03-1.02e+04)	c	1.15e+04(1.14e+04-1.19e+04)	cd	2.09e+03(2.01e+03-2.23e+03)	a	1.08e-11	9.73e+02(8.93e+02-1.01e+03)	a	7.90e+03(6.76e+03-1.02e+04)	b	1.15e+04(8.57e+03-1.47e+04)	bc	1.53e+04(1.46e+04-1.59e+04)	c	8.27e+03(6.62e+03-8.78e+03)	b	8.28e+03(7.73e+03-1.07e+04)	b	2.35e+03(2.24e+03-2.54e+03)	a	2.25e-11	8.75e+02(7.81e+02-1.02e+03)	a	1.15e+04(1.10e+04-1.15e+04)	bc	2.49e+04(2.39e+04-2.59e+04)	de	2.56e+04(2.38e+04-2.86e+04)	e	1.66e+04(1.42e+04-1.88e+04)	cd	1.16e+04(1.14e+04-1.17e+04)	bc	2.64e+03(2.40e+03-2.69e+03)	ab	3.72e-08	7.07e+02(5.58e+02-8.11e+02)	a	1.98e+04(1.87e+04-2.01e+04)	cd
65.0368	2.72e+00(2.55e+00-2.96e+00)	a	1.85e+00(1.72e+00-2.27e+00)	a	1.92e+00(1.70e+00-2.09e+00)	a	3.11e+00(2.51e+00-4.21e+00)	a	1.46e+00(1.31e+00-1.79e+00)	a	1.22e+00(1.21e+00-1.44e+00)	a	1.01e+00(9.83e-01-1.17e+00)	a	0.0229351	1.27e+01(8.80e+00-2.34e+01)	ab	2.63e+01(9.73e+00-4.12e+01)	b	1.44e+01(1.26e+01-1.66e+01)	ab	6.91e+00(2.48e+00-1.56e+01)	ab	1.68e+00(7.13e-01-2.61e+00)	a	3.10e+00(2.87e+00-3.31e+00)	a	2.55e-01(2.31e-01-2.72e-01)	a	0.000214507	8.13e-01(6.61e-01-8.39e-01)	a c	6.17e-01(5.49e-01-7.86e-01)	ab	3.37e+00(2.55e+00-3.97e+00)	bc	3.22e+00(2.90e+00-3.80e+00)	c	2.58e+00(1.72e+00-2.61e+00)	a c	1.01e+00(8.96e-01-1.25e+00)	a c	3.26e-01(2.27e-01-3.35e-01)	a	0.000612164	1.45e+00(7.85e-01-1.60e+00)	ab	1.38e+00(1.18e+00-1.77e+00)	ab
65.0575	4.73e-01(4.33e-01-5.48e-01)	a	3.10e+00(3.02e+00-3.55e+00)	c	5.76e-01(5.15e-01-5.95e-01)	a	1.59e+00(1.51e+00-1.84e+00)	b	1.55e+00(1.55e+00-1.57e+00)	b	2.73e+00(2.66e+00-2.74e+00)	c	6.05e-01(5.26e-01-6.24e-01)	a	6.22e-09	2.16e+00(1.42e+00-4.02e+00)	ab	9.48e+00(2.82e+00-1.94e+01)	b	5.53e+00(2.19e+00-8.96e+00)	ab	4.08e+00(2.77e+00-6.87e+00)	ab	9.78e-01(4.03e-01-1.35e+00)	a	3.87e+00(1.50e+00-6.91e+00)	ab	4.07e+00(3.66e+00-4.62e+00)	ab	0.0196677	4.10e-01(3.29e-01-4.26e-01)	a	4.19e-01(4.01e-01-4.43e-01)	a	6.63e-01(6.20e-01-7.17e-01)	ab	8.38e-01(7.70e-01-1.03e+00)	ab	7.58e-01(5.87e-01-9.45e-01)	ab	9.81e-01(9.73e-01-1.04e+00)	ab	1.48e+00(1.13e+00-1.50e+00)	b	0.00426412	6.30e-01(4.40e-01-6.38e-01)	a	2.23e+00(1.96e+00-2.30e+00)	c
67.0227	7.36e-01(6.35e-01-7.54e-01)	b	2.74e-01(2.72e-01-2.79e-01)	a	2.49e-01(2.38e-01-2.67e-01)	a	6.18e-01(5.47e-01-7.33e-01)	b	2.63e-01(2.57e-01-2.74e-01)	a	2.42e-01(2.33e-01-2.46e-01)	a	3.02e-01(3.01e-01-3.06e-01)	a	2.27e-05	2.54e+00(1.53e+00-5.66e+00)	a	4.37e+00(1.59e+00-6.51e+00)	a	3.27e+00(2.53e+00-3.52e+00)	a	1.96e+00(4.15e-01-3.57e+00)	a	2.48e-01(1.53e-01-2.61e-01)	a	3.26e-01(3.05e-01-5.09e-01)	a	1.60e-01(1.56e-01-1.73e-01)	a	0.51604	7.98e-02(6.96e-02-1.07e-01)	a	9.36e-02(9.13e-02-1.00e-01)	a	2.57e-01(2.41e-01-3.06e-01)	bc	3.31e-01(3.08e-01-3.95e-01)	c	2.00e-01(1.56e-01-2.06e-01)	ab	1.89e-01(1.79e-01-1.89e-01)	ab	2.61e-02(2.37e-02-3.72e-02)	a	1.77e-05	8.90e-02(5.86e-02-9.23e-02)	a	1.77e-01(1.56e-01-1.96e-01)	a c
69.0328	2.11e+00(2.05e+00-2.96e+00)	a	1.40e+02(1.37e+02-1.43e+02)	a	2.75e+01(2.72e+01-3.05e+01)	a	1.42e+02(1.40e+02-1.49e+02)	a	1.10e+02(1.04e+02-2.38e+02)	a	4.59e+02(4.12e+02-5.15e+02)	b	6.76e+01(5.94e+01-7.04e+01)	a	2.25e-05	5.68e+00(4.89e+00-7.56e+00)	a	2.94e+02(1.75e+02-4.52e+02)	b	1.09e+02(5.22e+01-1.67e+02)	a	1.15e+02(9.65e+01-1.19e+02)	a	2.76e+01(1.76e+01-5.00e+01)	a	7.17e+01(6.99e+01-1.63e+02)	ab	1.70e+02(1.55e+02-1.89e+02)	ab	2.91e-05	1.40e+00(1.33e+00-1.43e+00)	a	3.92e+01(3.18e+01-4.09e+01)	ab	8.46e+01(8.15e+01-8.71e+01)	d	7.91e+01(7.30e+01-8.66e+01)	cd	4.18e+01(3.43e+01-4.93e+01)	b	4.74e+01(4.08e+01-4.90e+01)	bc	4.85e+01(3.80e+01-4.89e+01)	b	2.36e-06	1.19e+00(1.18e+00-1.29e+00)	a	1.44e+02(1.33e+02-1.44e+02)	c
69.0693	6.17e+01(6.09e+01-6.67e+01)	a	1.45e+02(1.44e+02-1.66e+02)	b	1.76e+01(1.72e+01-2.00e+01)	a	1.98e+02(1.87e+02-2.08e+02)	bc	2.44e+02(2.39e+02-2.85e+02)	c	1.64e+02(1.60e+02-1.73e+02)	b	4.07e+01(3.89e+01-4.29e+01)	a	2.13e-08	5.96e+02(4.85e+02-7.47e+02)	ab	1.61e+03(3.41e+02-3.01e+03)	b	8.39e+02(2.47e+02-1.36e+03)	ab	2.99e+02(2.33e+02-3.84e+02)	ab	6.98e+01(1.66e+01-1.62e+02)	a	2.81e+02(1.61e+02-4.65e+02)	ab	5.23e+02(5.00e+02-5.84e+02)	ab	0.0057191	8.23e+00(7.29e+00-9.69e+00)	ab	8.51e+00(8.14e+00-8.81e+00)	ab	1.92e+01(1.88e+01-2.04e+01)	c	1.38e+01(1.29e+01-1.53e+01)	bc	1.10e+01(9.04e+00-1.29e+01)	ab	6.37e+00(6.19e+00-6.63e+00)	a	6.02e+00(5.08e+00-6.43e+00)	a	1.28e-05	3.58e+00(3.40e+00-4.21e+00)	a	3.26e+01(3.04e+01-3.27e+01)	e
71.0484	6.08e+00(6.03e+00-6.63e+00)	a	3.00e+01(2.94e+01-3.41e+01)	c	1.68e+01(1.65e+01-1.84e+01)	b	4.16e+01(4.13e+01-4.54e+01)	d	3.70e+01(3.59e+01-3.75e+01)	cd	3.88e+01(3.83e+01-3.95e+01)	cd	1.37e+01(1.29e+01-1.47e+01)	ab	8.04e-10	1.56e+01(1.10e+01-1.86e+01)	a	1.01e+02(4.17e+01-1.67e+02)	b	8.73e+01(4.00e+01-1.32e+02)	ab	6.54e+01(5.66e+01-8.10e+01)	ab	2.38e+01(1.58e+01-3.43e+01)	ab	3.54e+01(2.77e+01-5.38e+01)	ab	4.37e+01(4.22e+01-4.94e+01)	ab	0.00206469	1.08e+00(9.46e-01-1.09e+00)	a	1.20e+01(1.15e+01-1.25e+01)	a	3.12e+01(2.98e+01-3.23e+01)	b	3.16e+01(2.84e+01-3.69e+01)	b	1.46e+01(1.18e+01-1.65e+01)	a	1.19e+01(1.19e+01-1.24e+01)	a	7.97e+00(6.98e+00-8.39e+00)	a	5.08e-07	8.69e-01(6.96e-01-9.06e-01)	a	3.49e+01(3.30e+01-3.51e+01)	d
71.0849	7.18e+00(7.09e+00-7.77e+00)	a	1.61e+01(1.58e+01-1.75e+01)	b	2.93e+00(2.87e+00-3.32e+00)	a	1.93e+01(1.74e+01-1.94e+01)	b	2.95e+01(2.95e+01-2.99e+01)	c	1.80e+01(1.67e+01-2.04e+01)	b	7.87e+00(7.20e+00-8.23e+00)	a	1.04e-09	1.03e+02(5.22e+01-1.99e+02)	a	1.36e+02(3.31e+01-2.62e+02)	a	9.21e+01(2.90e+01-1.45e+02)	a	3.50e+01(3.39e+01-4.01e+01)	a	6.96e+00(3.34e+00-1.56e+01)	a	3.62e+01(1.14e+01-5.67e+01)	a	5.83e+01(5.28e+01-6.46e+01)	a	0.0109397	2.58e+00(2.17e+00-2.69e+00)	a c	2.10e+00(1.86e+00-2.14e+00)	a c	2.72e+00(2.64e+00-3.25e+00)	bc	3.18e+00(2.88e+00-3.29e+00)	c	2.01e+00(1.67e+00-2.26e+00)	a c	1.23e+00(1.20e+00-1.29e+00)	a	1.50e+00(1.32e+00-1.58e+00)	ab	0.00106762	1.60e+00(1.40e+00-1.88e+00)	a	4.36e+00(4.03e+00-4.46e+00)	d
73.0276	3.65e+00(3.60e+00-3.93e+00)	a	7.39e+00(7.18e+00-7.80e+00)	b	4.61e+00(4.47e+00-4.82e+00)	a	6.54e+00(6.41e+00-6.86e+00)	b	7.08e+00(6.90e+00-7.18e+00)	b	7.69e+00(7.67e+00-7.80e+00)	b	4.76e+00(4.73e+00-5.04e+00)	a	1.58e-08	5.06e+00(4.97e+00-5.15e+00)	a	1.83e+01(1.02e+01-3.06e+01)	b	9.99e+00(7.03e+00-1.40e+01)	ab	8.58e+00(8.24e+00-9.17e+00)	a	5.77e+00(4.87e+00-6.14e+00)	a	6.67e+00(5.93e+00-8.81e+00)	a	8.32e+00(7.82e+00-9.03e+00)	ab	0.000189149	2.66e+00(2.64e+00-2.78e+00)	a	5.90e+00(5.72e+00-6.05e+00)	bc	7.02e+00(6.86e+00-7.18e+00)	c	6.60e+00(5.91e+00-7.25e+00)	bc	5.48e+00(4.88e+00-6.22e+00)	bc	4.79e+00(4.70e+00-4.79e+00)	a c	3.99e+00(3.75e+00-4.19e+00)	ab	8.64e-05	2.91e+00(2.67e+00-3.04e+00)	a	8.65e+00(8.33e+00-8.89e+00)	d
73.0641	5.96e+00(5.62e+00-6.39e+00)	a	8.85e+01(8.62e+01-1.02e+02)	bc	2.14e+01(2.03e+01-2.46e+01)	a	1.48e+02(1.46e+02-1.61e+02)	c	3.50e+02(3.27e+02-3.55e+02)	d	3.92e+02(3.80e+02-4.10e+02)	d	4.35e+01(4.06e+01-4.64e+01)	ab	5.36e-13	6.52e+00(5.29e+00-1.25e+01)	a	2.67e+02(8.57e+01-4.59e+02)	b	1.58e+02(4.29e+01-2.78e+02)	ab	1.34e+02(9.79e+01-1.88e+02)	ab	5.03e+01(2.67e+01-9.54e+01)	ab	1.41e+02(1.12e+02-2.50e+02)	ab	1.52e+02(1.44e+02-1.69e+02)	ab	0.00664547	3.24e+00(3.15e+00-3.73e+00)	a	4.39e+01(4.01e+01-4.49e+01)	ab	1.35e+02(1.29e+02-1.40e+02)	c	1.19e+02(1.09e+02-1.35e+02)	bc	1.77e+02(1.47e+02-2.08e+02)	c	9.22e+01(8.85e+01-9.26e+01)	a c	4.35e+01(3.71e+01-4.37e+01)	ab	9.2e-06	3.66e+00(3.40e+00-4.35e+00)	a	2.40e+02(2.18e+02-2.47e+02)	b
74.0341	1.87e-01(1.64e-01-1.97e-01)	a	1.01e+00(9.44e-01-1.19e+00)	bc	3.89e-01(3.70e-01-4.18e-01)	ab	1.61e+00(1.47e+00-1.67e+00)	c	3.57e+00(3.21e+00-3.62e+00)	d	2.79e+00(2.76e+00-3.01e+00)	d	5.60e-01(5.03e-01-5.85e-01)	ab	2.94e-10	2.86e-01(2.68e-01-2.95e-01)	a	1.34e+00(9.44e-01-1.93e+00)	b	1.39e+00(8.75e-01-1.91e+00)	b	1.60e+00(1.35e+00-1.97e+00)	b	8.33e-01(6.63e-01-9.37e-01)	ab	1.14e+00(1.05e+00-1.30e+00)	ab	7.99e-01(7.49e-01-8.51e-01)	ab	3.34e-05	1.52e-01(1.47e-01-1.60e-01)	a	8.24e-01(8.21e-01-8.78e-01)	a c	1.65e+00(1.56e+00-1.67e+00)	a c	1.96e+00(1.68e+00-2.46e+00)	c	1.84e+00(1.60e+00-2.32e+00)	bc	1.19e+00(1.12e+00-1.19e+00)	a c	6.61e-01(5.74e-01-6.88e-01)	ab	0.000315946	1.36e-01(1.32e-01-1.52e-01)	a	4.17e+00(3.76e+00-4.34e+00)	c
75.9952	2.26e-02(1.64e-02-2.76e-02)	a	7.88e-01(7.27e-01-8.48e-01)	c	1.16e-01(1.12e-01-1.39e-01)	a	6.79e-01(6.54e-01-6.98e-01)	bc	2.70e+00(2.45e+00-2.72e+00)	d	2.04e+00(1.99e+00-2.16e+00)	d	2.60e-01(2.37e-01-2.89e-01)	ab	1.04e-11	4.20e-02(2.67e-02-5.39e-02)	a	5.48e-01(2.64e-01-8.35e-01)	a c	7.65e-01(3.50e-01-1.25e+00)	bc	1.12e+00(9.29e-01-1.15e+00)	c	3.09e-01(1.94e-01-5.83e-01)	ab	4.53e-01(2.37e-01-7.60e-01)	a c	3.69e-01(3.44e-01-3.97e-01)	a c	0.000123386	1.30e-02(1.27e-02-1.89e-02)	a	3.17e-01(2.85e-01-3.49e-01)	b	4.69e-01(4.38e-01-5.33e-01)	b	5.25e-01(4.61e-01-5.78e-01)	b	5.20e-01(4.50e-01-5.96e-01)	b	3.05e-01(3.01e-01-3.08e-01)	ab	3.87e-01(3.58e-01-4.00e-01)	b	4.41e-05	1.46e-02(1.32e-02-1.96e-02)	a	2.60e+00(2.26e+00-2.85e+00)	d
76.0471	1.18e+01(1.17e+01-1.78e+01)	a	1.90e+03(1.85e+03-2.16e+03)	c	3.13e+02(3.09e+02-3.45e+02)	ab	1.51e+03(1.51e+03-1.61e+03)	bc	7.79e+03(7.15e+03-8.03e+03)	e	5.80e+03(5.62e+03-6.07e+03)	d	6.02e+02(5.55e+02-6.32e+02)	ab	4.85e-12	2.23e+01(1.94e+01-2.55e+01)	a	1.24e+03(5.80e+02-1.96e+03)	ab	2.04e+03(7.81e+02-3.14e+03)	b	2.50e+03(2.00e+03-3.27e+03)	b	8.30e+02(4.35e+02-1.46e+03)	ab	1.15e+03(5.46e+02-1.94e+03)	ab	8.23e+02(7.88e+02-9.02e+02)	ab	0.000221391	1.41e+01(1.23e+01-1.76e+01)	a	7.54e+02(6.80e+02-7.77e+02)	ab	1.14e+03(1.08e+03-1.19e+03)	b	1.18e+03(1.07e+03-1.34e+03)	b	1.24e+03(1.06e+03-1.47e+03)	b	8.02e+02(7.55e+02-8.05e+02)	b	8.99e+02(7.83e+02-9.24e+02)	b	4.67e-05	1.41e+01(1.30e+01-1.48e+01)	a	7.81e+03(6.96e+03-8.19e+03)	e
79.053	4.25e+01(4.24e+01-4.70e+01)	c	9.31e+00(9.06e+00-9.54e+00)	a	1.31e+01(1.23e+01-1.54e+01)	ab	2.59e+01(2.23e+01-3.34e+01)	bc	1.13e+01(9.47e+00-1.17e+01)	a	1.18e+01(1.06e+01-1.33e+01)	ab	1.46e+01(1.42e+01-1.56e+01)	ab	3.67e-06	1.39e+02(1.00e+02-1.77e+02)	a	7.00e+02(2.49e+02-1.13e+03)	b	2.08e+02(1.59e+02-3.08e+02)	ab	9.55e+01(4.71e+01-1.69e+02)	a	2.02e+01(1.22e+01-3.95e+01)	a	1.06e+02(7.68e+01-1.51e+02)	a	4.66e+01(4.45e+01-5.15e+01)	a	0.000266196	2.60e+00(2.42e+00-4.34e+00)	a	7.56e+00(6.47e+00-7.84e+00)	ab	2.88e+01(2.60e+01-3.80e+01)	b	3.00e+01(2.78e+01-3.36e+01)	ab	2.17e+01(1.39e+01-2.87e+01)	ab	1.07e+01(8.23e+00-1.27e+01)	ab	6.44e+00(5.29e+00-6.50e+00)	ab	0.00114219	3.35e+00(2.33e+00-3.46e+00)	a	1.38e+01(1.18e+01-1.60e+01)	a c
82.0272	2.90e+00(2.55e+00-2.95e+00)	c	1.05e-01(9.55e-02-1.08e-01)	a	3.54e-01(3.26e-01-3.85e-01)	a	1.73e+00(1.35e+00-2.19e+00)	bc	2.24e-01(1.97e-01-2.55e-01)	a	4.04e-01(3.60e-01-4.14e-01)	a	1.14e+00(1.13e+00-1.17e+00)	ab	2.12e-06	7.63e+00(6.20e+00-1.17e+01)	a	1.01e+01(6.53e+00-1.39e+01)	a	9.67e+00(9.40e+00-1.03e+01)	a	4.85e+00(7.09e-01-9.27e+00)	a	2.52e-01(1.72e-01-4.57e-01)	a	2.19e-01(9.22e-02-3.43e-01)	a	4.79e-01(4.57e-01-5.65e-01)	a	0.512229	4.80e-03(3.95e-03-9.15e-03)	a	8.27e-02(6.93e-02-9.21e-02)	a	3.37e-01(3.31e-01-3.72e-01)	b	2.65e-01(2.29e-01-3.07e-01)	b	9.40e-02(7.31e-02-1.10e-01)	a	5.87e-02(5.81e-02-6.01e-02)	a	1.01e-01(7.49e-02-1.07e-01)	a	2.98e-07	9.30e-03(9.25e-03-1.62e-02)	a	4.89e-01(4.82e-01-5.12e-01)	c
83.045	1.39e+00(1.26e+00-1.39e+00)	a	5.50e+00(5.33e+00-5.84e+00)	ab	4.30e+00(4.16e+00-4.55e+00)	a	1.08e+01(1.04e+01-1.11e+01)	a c	1.76e+01(1.58e+01-1.81e+01)	bc	5.17e+01(4.77e+01-5.52e+01)	d	1.89e+01(1.70e+01-2.01e+01)	c	3.95e-10	7.80e+00(4.35e+00-8.47e+00)	ab	2.18e+01(1.11e+01-3.20e+01)	ab	2.70e+01(1.59e+01-3.44e+01)	ab	2.32e+01(2.15e+01-3.55e+01)	ab	8.09e+00(5.40e+00-1.57e+01)	a	7.04e+00(6.73e+00-1.26e+01)	a	4.63e+01(4.34e+01-5.15e+01)	b	0.00193296	3.37e-01(2.83e-01-3.54e-01)	a	5.25e+00(4.54e+00-5.40e+00)	ab	1.98e+01(1.87e+01-2.02e+01)	d	1.15e+01(1.04e+01-1.29e+01)	c	5.03e+00(4.18e+00-5.79e+00)	ab	3.31e+00(3.20e+00-3.32e+00)	a	1.02e+01(8.36e+00-1.05e+01)	bc	1.47e-08	3.72e-01(2.84e-01-4.20e-01)	a	2.15e+01(1.97e+01-2.17e+01)	e
83.0852	5.95e+01(5.76e+01-6.35e+01)	a	1.94e+02(1.94e+02-2.24e+02)	b	2.52e+01(2.47e+01-2.85e+01)	a	4.51e+02(4.46e+02-5.02e+02)	c	5.92e+02(5.83e+02-6.03e+02)	d	2.82e+02(2.79e+02-2.94e+02)	b	4.20e+01(4.01e+01-4.48e+01)	a	1.98e-12	4.84e+02(2.83e+02-1.12e+03)	a	4.38e+03(7.31e+02-9.17e+03)	a	2.80e+03(1.59e+02-5.73e+03)	a	8.86e+02(1.67e+02-1.72e+03)	a	2.59e+02(3.03e+01-6.29e+02)	a	6.84e+02(6.53e+02-1.06e+03)	a	1.69e+03(1.61e+03-1.88e+03)	a	0.0180896	3.87e+01(3.25e+01-4.61e+01)	b	8.63e+00(8.01e+00-9.40e+00)	a	3.20e+01(3.14e+01-3.39e+01)	b	7.65e+00(6.92e+00-8.12e+00)	a	7.15e+00(6.13e+00-7.63e+00)	a	2.76e+00(2.70e+00-2.84e+00)	a	4.18e+00(4.03e+00-5.54e+00)	a	1.63e-06	1.43e+01(1.40e+01-1.65e+01)	a	5.85e+01(5.53e+01-5.89e+01)	c
85.0275	4.72e-01(4.37e-01-5.38e-01)	a	6.29e+00(6.17e+00-6.92e+00)	d	3.62e+00(3.28e+00-3.63e+00)	b	5.64e+00(5.46e+00-6.22e+00)	cd	3.58e+00(3.57e+00-3.65e+00)	b	4.37e+00(4.34e+00-4.46e+00)	bc	1.64e+00(1.57e+00-1.77e+00)	a	2.08e-09	7.93e-01(7.48e-01-9.76e-01)	a	9.34e+00(7.63e+00-9.65e+00)	d	5.71e+00(3.66e+00-8.22e+00)	c	4.48e+00(4.02e+00-4.78e+00)	bc	2.36e+00(1.77e+00-2.61e+00)	ab	6.34e+00(5.13e+00-6.73e+00)	cd	2.29e+00(2.20e+00-2.42e+00)	ab	7.91e-11	4.04e-01(3.90e-01-4.72e-01)	a	3.73e+00(3.56e+00-3.83e+00)	c	6.05e+00(5.89e+00-6.28e+00)	d	4.52e+00(4.31e+00-5.29e+00)	cd	4.16e+00(3.43e+00-4.67e+00)	cd	3.10e+00(3.00e+00-3.15e+00)	bc	1.14e+00(1.02e+00-1.16e+00)	ab	3.93e-07	4.25e-01(3.34e-01-4.34e-01)	a	6.25e+00(5.99e+00-6.29e+00)	c
85.0637	1.03e+00(9.97e-01-1.07e+00)	a	7.10e+00(6.97e+00-8.03e+00)	b	3.32e+00(3.26e+00-3.62e+00)	a	1.21e+01(1.20e+01-1.33e+01)	c	1.48e+01(1.45e+01-1.50e+01)	c	1.43e+01(1.41e+01-1.45e+01)	c	3.67e+00(3.48e+00-3.87e+00)	a	4.21e-12	5.39e+00(2.11e+00-1.22e+01)	a	3.71e+01(1.14e+01-6.68e+01)	a	2.50e+01(7.60e+00-4.32e+01)	a	1.72e+01(1.20e+01-2.47e+01)	a	6.85e+00(3.71e+00-1.15e+01)	a	1.82e+01(1.10e+01-2.78e+01)	a	1.88e+01(1.83e+01-2.16e+01)	a	0.0213898	7.55e-01(6.01e-01-7.77e-01)	a	3.45e+00(3.36e+00-3.65e+00)	ab	1.25e+01(1.18e+01-1.29e+01)	d	8.43e+00(7.75e+00-9.97e+00)	cd	6.11e+00(5.14e+00-7.09e+00)	bc	3.88e+00(3.74e+00-3.90e+00)	ab	2.08e+00(1.79e+00-2.14e+00)	ab	1.46e-07	6.61e-01(5.29e-01-6.87e-01)	a	1.06e+01(9.89e+00-1.07e+01)	cd
85.0961	7.80e-01(7.22e-01-7.88e-01)	a	2.80e+00(2.74e+00-3.04e+00)	b	5.01e-01(4.77e-01-5.74e-01)	a	2.79e+00(2.77e+00-2.98e+00)	b	4.89e+00(4.80e+00-4.89e+00)	c	4.53e+00(4.10e+00-4.87e+00)	c	1.34e+00(1.21e+00-1.39e+00)	a	6.09e-10	3.03e+00(1.02e+00-7.16e+00)	a	1.59e+01(4.71e+00-3.17e+01)	a	1.03e+01(1.73e+00-1.92e+01)	a	4.78e+00(2.40e+00-7.20e+00)	a	1.74e+00(1.00e+00-3.83e+00)	a	5.76e+00(3.69e+00-9.15e+00)	a	9.88e+00(9.10e+00-1.10e+01)	a	0.0242801	5.11e-01(4.49e-01-5.89e-01)	ab	5.43e-01(5.41e-01-5.81e-01)	ab	1.11e+00(1.10e+00-1.22e+00)	c	8.31e-01(8.29e-01-9.19e-01)	bc	7.97e-01(6.33e-01-8.83e-01)	a c	4.17e-01(3.96e-01-4.35e-01)	ab	3.79e-01(3.08e-01-4.12e-01)	a	3.53e-05	3.89e-01(3.32e-01-4.21e-01)	a	1.24e+00(1.15e+00-1.29e+00)	c
87.0429	4.34e+00(4.26e+00-4.49e+00)	a	5.22e+01(5.12e+01-6.03e+01)	c	2.93e+01(2.84e+01-3.13e+01)	b	5.80e+01(5.65e+01-6.43e+01)	c	5.88e+01(5.82e+01-5.98e+01)	c	8.57e+01(8.55e+01-8.73e+01)	d	4.55e+01(4.28e+01-4.84e+01)	bc	1.72e-09	1.02e+01(6.64e+00-1.75e+01)	a	6.16e+01(5.80e+01-7.62e+01)	c	5.86e+01(5.41e+01-6.00e+01)	c	6.10e+01(4.99e+01-7.07e+01)	c	3.41e+01(3.23e+01-3.79e+01)	b	5.97e+01(5.68e+01-6.69e+01)	c	3.35e+01(3.15e+01-3.60e+01)	b	3.63e-12	3.17e+00(3.10e+00-3.66e+00)	a	7.44e+01(6.95e+01-7.61e+01)	cd	9.63e+01(9.25e+01-9.79e+01)	d	6.59e+01(6.09e+01-7.66e+01)	cd	6.79e+01(5.55e+01-7.70e+01)	bcd	3.55e+01(3.51e+01-3.59e+01)	a c	3.01e+01(2.59e+01-3.08e+01)	ab	9.62e-07	3.44e+00(2.85e+00-3.60e+00)	a	1.46e+02(1.39e+02-1.49e+02)	c
87.0794	4.23e+00(3.92e+00-4.46e+00)	a	3.08e+01(3.02e+01-3.48e+01)	b	5.58e+00(5.40e+00-6.56e+00)	a	4.13e+01(4.12e+01-4.53e+01)	b	8.82e+01(8.60e+01-8.94e+01)	d	6.82e+01(6.65e+01-7.27e+01)	c	9.73e+00(9.29e+00-1.03e+01)	a	4.97e-13	1.35e+01(4.50e+00-3.77e+01)	a	1.57e+02(4.11e+01-2.84e+02)	a	1.19e+02(2.00e+01-2.20e+02)	a	5.32e+01(3.14e+01-7.92e+01)	a	1.81e+01(7.00e+00-3.90e+01)	a	6.73e+01(3.88e+01-1.20e+02)	a	9.45e+01(9.07e+01-1.05e+02)	a	0.0210885	1.72e+00(1.53e+00-1.94e+00)	a	8.93e+00(8.09e+00-9.38e+00)	ab	2.41e+01(2.34e+01-2.58e+01)	d	1.94e+01(1.76e+01-2.14e+01)	bcd	2.28e+01(1.86e+01-2.67e+01)	cd	1.16e+01(1.13e+01-1.18e+01)	a c	6.02e+00(5.06e+00-6.10e+00)	a	6.4e-06	1.10e+00(1.06e+00-1.40e+00)	a	3.08e+01(2.82e+01-3.22e+01)	b
89.0591	2.14e+00(2.13e+00-2.23e+00)	a	5.71e+01(5.57e+01-6.36e+01)	b	5.94e+01(5.72e+01-6.24e+01)	b	1.15e+02(1.13e+02-1.26e+02)	c	1.82e+02(1.71e+02-1.86e+02)	d	1.50e+02(1.48e+02-1.56e+02)	cd	2.57e+01(2.40e+01-2.71e+01)	a	7.51e-12	7.07e+00(3.65e+00-1.08e+01)	a	1.46e+02(5.99e+01-2.59e+02)	ab	2.14e+02(1.20e+02-3.16e+02)	b	2.28e+02(2.06e+02-2.58e+02)	b	8.83e+01(6.51e+01-1.13e+02)	ab	1.10e+02(7.30e+01-1.62e+02)	ab	5.06e+01(4.87e+01-5.64e+01)	ab	4.15e-05	2.26e+00(1.99e+00-2.42e+00)	a	2.96e+01(2.92e+01-3.03e+01)	ab	1.11e+02(1.06e+02-1.14e+02)	cd	1.45e+02(1.31e+02-1.69e+02)	d	6.45e+01(5.47e+01-7.60e+01)	bc	5.20e+01(5.08e+01-5.23e+01)	a c	2.92e+01(2.52e+01-3.02e+01)	ab	5.83e-07	2.78e+00(1.87e+00-2.89e+00)	a	1.31e+02(1.19e+02-1.34e+02)	b
95.0195	2.06e+00(1.84e+00-2.13e+00)	b	1.09e+00(1.04e+00-1.21e+00)	a	9.00e-01(8.97e-01-9.59e-01)	a	3.09e+00(2.76e+00-3.24e+00)	c	1.26e+00(1.21e+00-1.27e+00)	ab	1.22e+00(1.18e+00-1.24e+00)	ab	1.35e+00(1.32e+00-1.38e+00)	ab	6.14e-07	1.26e+01(6.07e+00-1.65e+01)	a	2.05e+01(7.17e+00-3.80e+01)	a	1.16e+01(1.05e+01-1.33e+01)	a	6.01e+00(3.02e+00-1.18e+01)	a	1.19e+00(8.93e-01-1.42e+00)	a	1.13e+00(1.04e+00-1.62e+00)	a	9.42e-01(8.87e-01-1.04e+00)	a	0.512361	4.11e-01(3.46e-01-4.34e-01)	a	9.44e-01(9.37e-01-9.79e-01)	ab	2.00e+00(1.85e+00-2.00e+00)	bc	2.45e+00(2.09e+00-3.09e+00)	c	1.08e+00(9.10e-01-1.25e+00)	ab	9.55e-01(9.20e-01-9.84e-01)	ab	5.46e-01(4.76e-01-5.64e-01)	ab	0.000118159	3.82e-01(3.24e-01-4.11e-01)	a	1.47e+00(1.44e+00-1.51e+00)	d
95.0439	9.57e+00(9.31e+00-1.05e+01)	c	1.13e+00(1.10e+00-1.24e+00)	a	2.32e+00(2.22e+00-2.51e+00)	a	5.78e+00(4.82e+00-7.26e+00)	b	1.36e+00(1.35e+00-1.39e+00)	a	1.85e+00(1.84e+00-1.92e+00)	a	3.03e+00(2.96e+00-3.28e+00)	ab	5.15e-07	7.29e+01(3.84e+01-9.73e+01)	a	8.42e+01(2.62e+01-1.59e+02)	a	4.14e+01(4.02e+01-4.70e+01)	a	1.67e+01(3.69e+00-4.44e+01)	a	1.66e+00(1.20e+00-2.41e+00)	a	2.11e+00(1.97e+00-3.45e+00)	a	1.81e+00(1.69e+00-2.02e+00)	a	0.076051	3.45e-01(3.44e-01-3.77e-01)	a	7.17e-01(6.88e-01-7.47e-01)	ab	1.82e+00(1.77e+00-1.96e+00)	c	2.07e+00(1.92e+00-2.23e+00)	c	1.43e+00(1.20e+00-1.60e+00)	bc	8.42e-01(7.97e-01-8.47e-01)	ab	6.06e-01(5.73e-01-6.82e-01)	a	4.26e-07	4.06e-01(3.19e-01-4.15e-01)	a	1.31e+00(1.21e+00-1.34e+00)	bc
98.0313	8.81e+00(8.80e+00-3.34e+01)	a	7.52e+02(7.42e+02-8.56e+02)	b	5.76e+02(5.50e+02-5.87e+02)	b	1.16e+03(1.14e+03-1.26e+03)	c	5.72e+02(5.64e+02-5.89e+02)	b	5.70e+02(5.64e+02-5.78e+02)	b	1.94e+02(1.86e+02-2.08e+02)	a	2.94e-10	2.01e+01(1.89e+01-2.13e+01)	a	1.51e+03(1.41e+03-1.73e+03)	cd	1.60e+03(8.54e+02-2.40e+03)	d	1.39e+03(1.10e+03-1.76e+03)	bcd	5.00e+02(3.32e+02-6.08e+02)	ab	5.79e+02(4.04e+02-7.90e+02)	a c	2.19e+02(2.11e+02-2.42e+02)	a	7.02e-08	6.49e+00(6.46e+00-6.74e+00)	a	5.39e+02(5.29e+02-5.64e+02)	ab	1.07e+03(1.03e+03-1.11e+03)	bc	1.58e+03(1.42e+03-1.84e+03)	c	3.68e+02(3.01e+02-4.11e+02)	a	5.02e+02(4.84e+02-5.09e+02)	ab	1.60e+02(1.41e+02-1.67e+02)	a	1.39e-07	1.24e+01(9.96e+00-1.36e+01)	a	9.43e+02(9.26e+02-9.73e+02)	c
99.0798	6.03e-01(6.01e-01-6.10e-01)	a	5.79e+00(5.79e+00-6.51e+00)	b	1.39e+00(1.32e+00-1.52e+00)	a	6.13e+00(5.95e+00-6.70e+00)	b	9.87e+00(9.85e+00-9.93e+00)	c	6.90e+00(6.76e+00-7.13e+00)	b	1.52e+00(1.51e+00-1.63e+00)	a	2.41e-12	6.17e+00(1.19e+00-1.41e+01)	a	3.04e+01(7.76e+00-5.81e+01)	a	1.77e+01(3.73e+00-3.34e+01)	a	7.68e+00(4.84e+00-1.11e+01)	a	2.99e+00(1.55e+00-5.91e+00)	a	1.23e+01(5.55e+00-1.83e+01)	a	1.23e+01(1.17e+01-1.41e+01)	a	0.0205022	5.65e-01(4.87e-01-6.70e-01)	a	1.44e+00(1.33e+00-1.53e+00)	ab	3.63e+00(3.53e+00-3.99e+00)	d	3.50e+00(3.12e+00-3.74e+00)	cd	2.35e+00(1.93e+00-2.67e+00)	bc	1.26e+00(1.26e+00-1.27e+00)	ab	1.03e+00(9.26e-01-1.06e+00)	ab	9.6e-07	4.08e-01(3.00e-01-4.62e-01)	a	3.78e+00(3.51e+00-3.92e+00)	c
101.057	3.15e-01(3.14e-01-3.49e-01)	a	2.91e+00(2.87e+00-3.26e+00)	b	2.77e+00(2.76e+00-3.03e+00)	b	5.96e+00(5.85e+00-6.40e+00)	c	7.83e+00(7.57e+00-7.84e+00)	d	9.65e+00(9.64e+00-9.87e+00)	e	4.07e+00(3.87e+00-4.38e+00)	b	6.9e-13	1.20e+00(4.56e-01-1.96e+00)	a	7.48e+00(5.51e+00-1.08e+01)	b	1.06e+01(6.67e+00-1.46e+01)	b	1.10e+01(9.51e+00-1.14e+01)	b	5.28e+00(4.10e+00-6.63e+00)	ab	5.31e+00(5.21e+00-7.67e+00)	ab	4.29e+00(4.12e+00-4.90e+00)	ab	2.91e-06	3.16e-01(2.81e-01-3.98e-01)	a	3.85e+00(3.75e+00-4.08e+00)	ab	1.46e+01(1.38e+01-1.47e+01)	d	8.11e+00(7.40e+00-9.45e+00)	c	4.75e+00(3.94e+00-5.53e+00)	bc	2.98e+00(2.95e+00-3.02e+00)	ab	3.44e+00(2.94e+00-3.51e+00)	ab	8e-09	3.80e-01(3.12e-01-3.96e-01)	a	1.14e+01(1.08e+01-1.15e+01)	d
101.095	4.87e+00(4.66e+00-5.18e+00)	a	2.55e+01(2.50e+01-2.91e+01)	b	3.70e+00(3.57e+00-4.26e+00)	a	4.93e+01(4.75e+01-5.37e+01)	c	6.87e+01(6.76e+01-6.98e+01)	d	3.59e+01(3.56e+01-3.75e+01)	b	4.51e+00(4.40e+00-4.87e+00)	a	1.31e-12	3.21e+01(7.12e+00-9.37e+01)	a	3.29e+02(6.94e+01-6.40e+02)	a	2.10e+02(1.11e+01-4.12e+02)	a	8.26e+01(1.18e+01-1.64e+02)	a	2.84e+01(4.32e+00-6.68e+01)	a	8.82e+01(6.85e+01-1.41e+02)	a	1.64e+02(1.57e+02-1.81e+02)	a	0.024246	4.28e+00(3.66e+00-5.11e+00)	ab	2.15e+00(2.09e+00-2.25e+00)	a	7.48e+00(7.10e+00-7.86e+00)	b	3.83e+00(3.54e+00-4.37e+00)	a	4.27e+00(3.53e+00-4.93e+00)	a	2.09e+00(2.08e+00-2.12e+00)	a	1.36e+00(1.25e+00-1.56e+00)	a	1.53e-05	1.62e+00(1.58e+00-1.87e+00)	a	1.03e+01(9.62e+00-1.05e+01)	c
103.036	5.27e-01(4.80e-01-5.45e-01)	a	1.24e+00(1.21e+00-1.31e+00)	bc	9.38e-01(9.15e-01-9.64e-01)	ab	2.12e+00(2.03e+00-2.38e+00)	d	1.53e+00(1.50e+00-1.53e+00)	c	1.70e+00(1.66e+00-1.74e+00)	cd	6.45e-01(6.38e-01-7.09e-01)	a	1.88e-08	1.01e+00(6.77e-01-1.56e+00)	a	2.00e+00(1.34e+00-2.97e+00)	ab	1.92e+00(1.46e+00-2.46e+00)	ab	2.67e+00(2.40e+00-2.80e+00)	b	1.22e+00(9.49e-01-1.24e+00)	a	1.47e+00(1.32e+00-1.78e+00)	ab	7.36e-01(7.17e-01-7.66e-01)	a	5.69e-05	4.85e-01(4.24e-01-5.43e-01)	a	2.07e+00(1.98e+00-2.07e+00)	a	7.44e+00(6.88e+00-7.91e+00)	b	7.69e+00(6.50e+00-9.38e+00)	b	3.52e+00(2.92e+00-4.40e+00)	ab	2.23e+00(2.22e+00-2.24e+00)	a	7.67e-01(7.05e-01-7.68e-01)	a	1.13e-05	4.41e-01(4.20e-01-4.54e-01)	a	3.60e+00(3.40e+00-3.69e+00)	b
103.075	5.07e-01(5.00e-01-6.50e-01)	a	1.41e+01(1.40e+01-1.54e+01)	c	4.61e+00(4.34e+00-4.89e+00)	b	1.31e+01(1.29e+01-1.42e+01)	c	2.14e+01(2.13e+01-2.16e+01)	d	1.59e+01(1.56e+01-1.61e+01)	c	2.52e+00(2.41e+00-2.72e+00)	ab	2.08e-13	7.99e+00(1.42e+00-1.45e+01)	a	2.17e+01(1.22e+01-3.44e+01)	a	2.55e+01(8.31e+00-4.43e+01)	a	1.50e+01(1.09e+01-1.96e+01)	a	5.79e+00(4.04e+00-9.35e+00)	a	2.85e+01(1.08e+01-3.79e+01)	a	1.25e+01(1.21e+01-1.38e+01)	a	0.0237853	4.74e-01(4.63e-01-9.60e-01)	a	3.34e+00(2.76e+00-3.39e+00)	ab	1.06e+01(9.90e+00-1.13e+01)	d	7.03e+00(7.01e+00-8.55e+00)	cd	4.81e+00(4.16e+00-5.81e+00)	bc	2.54e+00(2.49e+00-2.55e+00)	ab	2.44e+00(2.06e+00-2.48e+00)	ab	3.32e-07	5.15e-01(3.82e-01-5.64e-01)	a	5.89e+00(5.52e+00-6.32e+00)	b
105.067	1.25e+00(1.19e+00-1.34e+00)	a	9.50e-01(9.12e-01-1.07e+00)	a	7.53e-01(7.51e-01-8.43e-01)	a	3.25e+00(2.85e+00-3.37e+00)	c	2.28e+00(2.23e+00-2.42e+00)	bc	2.66e+00(2.61e+00-2.80e+00)	c	1.51e+00(1.45e+00-1.58e+00)	ab	8.2e-08	1.28e+01(5.17e+00-2.42e+01)	ab	3.52e+01(7.29e+00-6.42e+01)	b	1.36e+01(9.31e+00-1.48e+01)	ab	5.71e+00(4.04e+00-1.26e+01)	ab	1.49e+00(8.44e-01-2.13e+00)	a	4.05e+00(3.51e+00-4.16e+00)	a	2.12e+00(2.01e+00-2.30e+00)	ab	0.0030509	1.03e-01(1.01e-01-1.24e-01)	a	6.25e-01(5.83e-01-6.52e-01)	ab	1.92e+00(1.85e+00-2.00e+00)	bc	1.90e+00(1.73e+00-2.45e+00)	c	1.77e+00(1.41e+00-2.13e+00)	bc	1.06e+00(1.04e+00-1.07e+00)	a c	7.00e-01(5.91e-01-7.42e-01)	ab	0.000128548	1.07e-01(8.74e-02-1.16e-01)	a	2.70e+00(2.32e+00-2.79e+00)	d
107.046	4.35e-01(4.18e-01-4.38e-01)	a	1.35e+00(1.31e+00-1.36e+00)	b	1.17e+00(1.10e+00-1.21e+00)	b	1.78e+00(1.69e+00-2.04e+00)	c	1.22e+00(1.21e+00-1.23e+00)	b	1.29e+00(1.24e+00-1.33e+00)	b	4.84e-01(4.67e-01-5.89e-01)	a	3.28e-07	2.12e+01(7.24e+00-3.66e+01)	a	2.37e+02(6.49e+01-4.73e+02)	b	3.73e+01(7.25e+00-1.70e+02)	ab	3.73e+01(1.10e+01-8.54e+01)	ab	1.26e+01(1.84e+00-2.60e+01)	a	1.07e+02(0.00e+00-1.57e+02)	ab	7.69e+01(5.92e+01-9.15e+01)	ab	0.00553708	2.69e-01(2.37e-01-3.07e-01)	a	8.26e-01(8.12e-01-1.12e+00)	ab	2.74e+00(2.64e+00-2.88e+00)	c	2.56e+00(2.44e+00-2.89e+00)	c	1.92e+00(1.60e+00-2.19e+00)	bc	9.47e-01(9.03e-01-9.48e-01)	ab	7.33e-01(6.91e-01-9.70e-01)	ab	1.49e-06	2.77e-01(2.36e-01-3.59e-01)	a	1.65e+01(1.62e+01-1.68e+01)	e
107.085	1.76e+01(1.70e+01-1.86e+01)	b	6.04e+00(5.97e+00-6.59e+00)	a	6.70e+00(6.46e+00-7.07e+00)	a	1.58e+01(1.42e+01-1.76e+01)	b	6.13e+00(6.00e+00-6.14e+00)	a	8.12e+00(7.87e+00-8.64e+00)	a	1.45e+01(1.39e+01-1.49e+01)	b	1.99e-07	1.22e+02(6.14e+01-2.09e+02)	ab	8.18e+02(5.81e+02-9.84e+02)	c	2.13e+02(1.73e+02-2.62e+02)	ab	1.24e+02(1.14e+02-1.27e+02)	ab	5.78e+01(3.15e+01-1.20e+02)	a	4.17e+02(1.90e+02-6.65e+02)	b	1.20e+02(1.17e+02-1.40e+02)	ab	6.69e-09	6.78e+00(6.43e+00-8.00e+00)	a	9.07e+00(7.82e+00-9.64e+00)	a	1.39e+01(1.30e+01-1.42e+01)	ab	1.10e+01(1.04e+01-1.19e+01)	a	9.01e+00(7.55e+00-9.69e+00)	a	7.57e+00(7.50e+00-7.84e+00)	a	2.08e+01(1.78e+01-2.12e+01)	b	5.26e-05	2.70e+00(2.55e+00-3.63e+00)	a	6.42e+00(6.23e+00-6.60e+00)	b
109.061	9.47e+00(8.60e+00-1.04e+01)	e	3.55e+00(3.38e+00-3.64e+00)	bcd	4.38e+00(4.08e+00-4.53e+00)	cd	4.84e+00(4.53e+00-4.85e+00)	d	1.33e+00(1.32e+00-1.36e+00)	ab	1.94e+00(1.91e+00-1.94e+00)	a c	9.21e-01(8.99e-01-9.83e-01)	a	1.18e-08	3.43e+01(5.44e+00-5.49e+01)	a	2.09e+01(5.85e+00-4.08e+01)	ab	1.21e+01(6.08e+00-1.78e+01)	ab	3.96e+00(2.84e+00-7.62e+00)	ab	1.28e+00(1.11e+00-1.51e+00)	b	2.00e+00(1.18e+00-2.49e+00)	b	1.16e+00(1.16e+00-1.29e+00)	ab	0.00110319	9.22e-02(9.20e-02-1.45e-01)	a	2.93e-01(2.61e-01-3.28e-01)	ab	1.03e+00(9.98e-01-1.11e+00)	cd	1.15e+00(1.14e+00-1.36e+00)	d	8.62e-01(7.05e-01-9.28e-01)	bcd	5.43e-01(5.28e-01-5.74e-01)	a c	5.33e-01(4.66e-01-6.28e-01)	a c	2.66e-06	1.67e-01(1.07e-01-1.75e-01)	a	5.24e-01(4.96e-01-5.50e-01)	b
109.1	4.07e+01(4.03e+01-4.54e+01)	b	1.13e+01(1.10e+01-1.22e+01)	a	2.30e+01(2.14e+01-2.33e+01)	a	4.20e+01(3.70e+01-4.30e+01)	b	1.51e+01(1.51e+01-1.53e+01)	a	1.32e+01(1.30e+01-1.34e+01)	a	1.74e+01(1.67e+01-1.85e+01)	a	3.32e-08	1.94e+02(1.66e+02-2.22e+02)	ab	4.52e+02(9.34e+01-8.81e+02)	b	1.73e+02(8.93e+01-2.19e+02)	ab	5.17e+01(4.44e+01-1.10e+02)	a	1.12e+01(2.96e+00-2.12e+01)	a	1.87e+01(1.85e+01-2.58e+01)	a	4.06e+01(3.93e+01-4.57e+01)	ab	0.0011986	8.44e-01(7.99e-01-8.51e-01)	a	5.99e-01(5.66e-01-9.88e-01)	a	1.94e+00(1.87e+00-2.06e+00)	b	1.05e+00(8.47e-01-1.09e+00)	a	5.91e-01(5.32e-01-6.66e-01)	a	3.24e-01(3.13e-01-3.41e-01)	a	4.38e-01(4.30e-01-7.93e-01)	a	0.000132003	6.00e-01(4.62e-01-6.45e-01)	a	1.60e+00(1.59e+00-1.64e+00)	bc
111.043	9.37e-01(7.68e-01-1.45e+00)	a	3.25e+01(3.23e+01-3.68e+01)	b	4.44e+01(4.15e+01-4.47e+01)	b	6.25e+01(6.16e+01-6.95e+01)	c	3.75e+01(3.74e+01-3.91e+01)	b	4.12e+01(4.08e+01-4.14e+01)	b	8.49e+00(8.09e+00-9.06e+00)	a	3.09e-10	1.24e+00(1.13e+00-1.37e+00)	a	5.40e+01(4.48e+01-5.84e+01)	bc	1.09e+02(7.36e+01-1.46e+02)	d	8.49e+01(7.90e+01-9.25e+01)	cd	2.80e+01(2.06e+01-3.16e+01)	ab	2.37e+01(2.34e+01-3.21e+01)	ab	7.35e+00(7.33e+00-8.27e+00)	ab	4.37e-11	6.44e-01(6.01e-01-6.74e-01)	a	3.08e+01(2.94e+01-3.17e+01)	a	2.23e+02(2.11e+02-2.28e+02)	c	8.51e+01(7.72e+01-9.90e+01)	b	2.20e+01(1.82e+01-2.48e+01)	a	1.11e+01(1.10e+01-1.13e+01)	a	4.93e+00(4.40e+00-5.20e+00)	a	5.52e-12	6.85e-01(5.74e-01-7.73e-01)	a	1.31e+02(1.24e+02-1.32e+02)	d
111.075	6.26e-01(5.95e-01-7.13e-01)	a	6.76e+00(6.53e+00-7.56e+00)	cd	5.36e+00(5.02e+00-5.44e+00)	bc	1.05e+01(1.01e+01-1.11e+01)	e	9.46e+00(9.05e+00-9.49e+00)	de	8.35e+00(8.19e+00-8.78e+00)	de	3.24e+00(3.10e+00-3.42e+00)	b	3.49e-10	3.43e+00(3.21e+00-3.84e+00)	a	3.91e+01(1.06e+01-7.07e+01)	b	2.23e+01(1.29e+01-3.32e+01)	ab	1.67e+01(1.49e+01-1.89e+01)	ab	5.04e+00(4.03e+00-7.50e+00)	a	9.23e+00(4.94e+00-1.52e+01)	ab	5.32e+00(5.09e+00-5.99e+00)	ab	0.00146232	2.28e-01(2.14e-01-2.33e-01)	a	2.52e+00(2.38e+00-2.79e+00)	a	1.95e+01(1.87e+01-2.27e+01)	c	1.06e+01(9.22e+00-1.15e+01)	b	3.79e+00(2.98e+00-4.38e+00)	a	1.94e+00(1.86e+00-1.97e+00)	a	1.58e+00(1.35e+00-1.59e+00)	a	1.88e-08	2.21e-01(1.80e-01-2.39e-01)	a	1.07e+01(1.01e+01-1.25e+01)	e
111.115	1.34e+00(1.33e+00-1.51e+00)	a	7.94e+00(7.80e+00-8.83e+00)	b	1.74e+00(1.65e+00-1.79e+00)	a	6.53e+00(6.52e+00-7.22e+00)	b	1.15e+01(1.15e+01-1.18e+01)	c	6.85e+00(6.61e+00-7.20e+00)	b	2.40e+00(2.38e+00-2.55e+00)	a	1.84e-11	2.40e+01(4.74e+00-6.67e+01)	a	3.86e+01(1.58e+01-6.70e+01)	a	3.08e+01(5.16e+00-5.84e+01)	a	1.10e+01(5.44e+00-1.71e+01)	a	3.44e+00(1.64e+00-6.22e+00)	a	1.12e+01(7.56e+00-1.59e+01)	a	1.14e+01(1.09e+01-1.27e+01)	a	0.0367012	3.78e-01(3.37e-01-4.03e-01)	a	7.73e-01(7.37e-01-7.81e-01)	ab	2.07e+00(2.03e+00-2.37e+00)	c	1.14e+00(1.11e+00-1.45e+00)	b	7.00e-01(6.33e-01-7.73e-01)	ab	4.01e-01(3.91e-01-4.67e-01)	a	3.69e-01(3.30e-01-3.98e-01)	a	2.35e-07	2.07e-01(1.95e-01-2.46e-01)	a	1.88e+00(1.77e+00-1.96e+00)	d
113.059	2.64e-01(2.48e-01-2.92e-01)	a	2.58e+00(2.58e+00-2.84e+00)	c	2.08e+00(2.00e+00-2.16e+00)	bc	4.08e+00(4.02e+00-4.42e+00)	d	4.58e+00(4.51e+00-4.61e+00)	d	3.79e+00(3.72e+00-3.86e+00)	d	1.50e+00(1.45e+00-1.60e+00)	b	9.35e-12	7.41e-01(5.68e-01-1.05e+00)	a	5.72e+00(2.61e+00-9.79e+00)	b	6.70e+00(3.83e+00-9.58e+00)	b	5.54e+00(5.13e+00-5.96e+00)	ab	2.94e+00(2.25e+00-3.58e+00)	ab	4.10e+00(2.61e+00-5.63e+00)	ab	1.82e+00(1.77e+00-2.03e+00)	ab	0.000566988	2.44e-01(2.21e-01-2.66e-01)	a	9.12e-01(8.57e-01-9.60e-01)	ab	5.22e+00(4.94e+00-5.24e+00)	d	3.29e+00(3.08e+00-3.89e+00)	c	1.86e+00(1.47e+00-2.09e+00)	b	1.11e+00(1.04e+00-1.15e+00)	ab	7.86e-01(6.83e-01-7.99e-01)	ab	9.36e-09	2.37e-01(1.84e-01-2.73e-01)	a	2.44e+00(2.38e+00-2.59e+00)	cd
113.097	5.16e-01(4.90e-01-5.42e-01)	a	5.90e+00(5.89e+00-6.83e+00)	bc	8.41e-01(8.38e-01-9.25e-01)	a	5.88e+00(5.81e+00-6.65e+00)	bc	8.17e+00(7.99e+00-8.38e+00)	c	4.88e+00(4.82e+00-5.11e+00)	b	1.01e+00(9.79e-01-1.11e+00)	a	1.92e-10	7.57e+00(1.06e+00-1.97e+01)	ab	5.93e+01(1.02e+01-1.25e+02)	b	2.49e+01(2.37e+00-5.01e+01)	ab	1.13e+01(2.78e+00-2.13e+01)	ab	3.65e+00(8.91e-01-7.42e+00)	a	1.36e+01(6.41e+00-2.00e+01)	ab	2.49e+01(2.40e+01-2.82e+01)	ab	0.0109677	3.06e-01(2.74e-01-3.19e-01)	a	4.04e-01(3.46e-01-4.26e-01)	a	9.96e-01(9.78e-01-1.11e+00)	c	7.32e-01(7.19e-01-8.05e-01)	bc	5.89e-01(5.08e-01-6.36e-01)	ab	3.07e-01(3.03e-01-3.24e-01)	a	2.43e-01(2.21e-01-3.05e-01)	a	3.57e-07	1.67e-01(1.38e-01-1.79e-01)	a	1.63e+00(1.54e+00-1.64e+00)	d
115.039	2.57e-01(2.46e-01-3.25e-01)	a	1.39e+00(1.35e+00-1.56e+00)	c	1.33e+00(1.17e+00-1.37e+00)	bc	2.56e+00(2.48e+00-2.96e+00)	d	1.54e+00(1.47e+00-1.56e+00)	c	1.31e+00(1.29e+00-1.37e+00)	bc	5.26e-01(5.19e-01-5.85e-01)	ab	1.36e-07	6.33e-01(4.52e-01-9.30e-01)	a	3.45e+00(3.35e+00-4.41e+00)	c	3.72e+00(2.30e+00-5.84e+00)	c	3.40e+00(3.02e+00-4.15e+00)	bc	1.21e+00(8.77e-01-1.42e+00)	ab	1.51e+00(1.24e+00-2.33e+00)	a c	8.16e-01(7.37e-01-9.21e-01)	ab	3.37e-06	2.10e-01(2.04e-01-2.25e-01)	a	1.03e+00(9.91e-01-1.10e+00)	ab	2.38e+00(2.26e+00-2.47e+00)	bc	3.28e+00(2.84e+00-4.13e+00)	c	1.23e+00(9.14e-01-1.37e+00)	ab	1.22e+00(1.20e+00-1.24e+00)	ab	4.61e-01(4.01e-01-4.92e-01)	a	3.03e-05	2.14e-01(1.89e-01-2.25e-01)	a	1.60e+00(1.47e+00-1.68e+00)	bc
115.076	2.48e-01(2.36e-01-2.52e-01)	a	2.23e+00(2.12e+00-2.38e+00)	c	1.38e+00(1.36e+00-1.50e+00)	bc	3.58e+00(3.56e+00-3.95e+00)	d	5.88e+00(5.61e+00-5.90e+00)	e	5.21e+00(5.09e+00-5.25e+00)	e	1.17e+00(1.11e+00-1.24e+00)	b	7.1e-13	3.78e+00(8.01e-01-8.13e+00)	a	1.13e+01(4.32e+00-2.06e+01)	a	1.01e+01(4.71e+00-1.70e+01)	a	6.62e+00(5.57e+00-6.91e+00)	a	2.68e+00(2.06e+00-3.42e+00)	a	4.14e+00(3.69e+00-5.48e+00)	a	3.19e+00(3.15e+00-3.72e+00)	a	0.0137849	1.59e-01(1.54e-01-1.74e-01)	a	7.89e-01(7.77e-01-8.05e-01)	ab	4.65e+00(4.38e+00-4.71e+00)	d	2.86e+00(2.61e+00-3.41e+00)	cd	1.86e+00(1.56e+00-2.26e+00)	bc	1.21e+00(1.20e+00-1.22e+00)	ab	6.91e-01(6.40e-01-7.59e-01)	ab	7.07e-08	1.70e-01(1.25e-01-1.80e-01)	a	1.81e+00(1.73e+00-1.90e+00)	cd
115.112	6.24e-01(5.88e-01-6.73e-01)	a	1.25e+01(1.24e+01-1.44e+01)	b	1.13e+00(1.09e+00-1.21e+00)	a	1.09e+01(1.06e+01-1.21e+01)	b	2.74e+01(2.74e+01-2.75e+01)	c	1.27e+01(1.27e+01-1.31e+01)	b	1.12e+00(1.09e+00-1.15e+00)	a	1.83e-13	1.35e+01(9.27e-01-4.33e+01)	a	6.31e+01(1.64e+01-1.20e+02)	a	6.57e+01(6.05e+00-1.33e+02)	a	2.37e+01(4.80e+00-4.67e+01)	a	1.55e+01(1.86e+00-3.35e+01)	a	4.47e+01(1.84e+01-6.98e+01)	a	4.38e+01(4.24e+01-4.96e+01)	a	0.154294	6.67e-01(5.59e-01-7.44e-01)	ab	7.36e-01(7.12e-01-7.77e-01)	b	1.38e+00(1.34e+00-1.45e+00)	c	5.26e-01(4.87e-01-5.45e-01)	ab	6.66e-01(5.38e-01-6.67e-01)	ab	2.79e-01(2.73e-01-3.03e-01)	a	2.70e-01(2.57e-01-2.97e-01)	a	6.78e-08	1.87e-01(1.76e-01-2.15e-01)	a	2.10e+00(1.98e+00-2.13e+00)	c
117.055	2.24e-01(2.22e-01-2.27e-01)	a	1.64e+00(1.49e+00-1.67e+00)	b	3.18e+00(2.97e+00-3.22e+00)	c	6.34e+00(6.32e+00-7.02e+00)	e	5.30e+00(5.11e+00-5.37e+00)	d	6.09e+00(6.06e+00-6.20e+00)	de	1.81e+00(1.77e+00-1.95e+00)	bc	6.24e-12	1.02e+00(1.69e-02-2.47e+00)	a	4.03e+00(2.31e+00-5.80e+00)	ab	7.88e+00(5.26e+00-1.10e+01)	bc	8.95e+00(7.67e+00-9.56e+00)	c	3.94e+00(3.14e+00-4.72e+00)	ab	4.96e+00(4.13e+00-5.91e+00)	a c	1.79e+00(1.74e+00-2.00e+00)	a	5.02e-07	2.22e-01(1.99e-01-2.62e-01)	a	1.42e+00(1.29e+00-1.47e+00)	a	8.42e+00(7.34e+00-8.89e+00)	b	7.50e+00(6.68e+00-9.16e+00)	b	4.65e+00(3.78e+00-5.60e+00)	ab	3.77e+00(3.75e+00-4.02e+00)	ab	1.40e+00(1.29e+00-1.43e+00)	a	9.77e-06	1.69e-01(1.64e-01-1.74e-01)	a	2.76e+00(2.60e+00-2.82e+00)	bc
117.091	8.56e-01(7.58e-01-1.22e+00)	a	2.00e+01(1.96e+01-2.05e+01)	c	4.42e+00(3.98e+00-5.06e+00)	a	1.25e+01(1.15e+01-1.29e+01)	b	2.76e+01(2.75e+01-2.86e+01)	d	1.24e+01(1.17e+01-1.30e+01)	b	1.63e+00(1.54e+00-1.85e+00)	a	8.47e-14	2.43e+01(2.21e+00-5.05e+01)	a	4.54e+01(1.79e+01-7.93e+01)	a	4.48e+01(9.77e+00-8.31e+01)	a	1.37e+01(7.23e+00-2.70e+01)	a	6.90e+00(3.46e+00-1.60e+01)	a	3.72e+01(1.11e+01-3.90e+01)	a	2.46e+01(2.37e+01-2.67e+01)	a	0.102301	7.64e-01(6.68e-01-2.06e+00)	a	5.50e+00(3.89e+00-6.17e+00)	a	2.29e+00(2.16e+00-3.90e+00)	a	6.16e+00(4.26e+00-9.15e+00)	a	2.63e+00(2.49e+00-2.98e+00)	a	1.23e+00(9.90e-01-1.27e+00)	a	3.90e+00(3.47e+00-3.91e+00)	a	0.0994437	1.29e+00(8.00e-01-1.43e+00)	a	1.71e+00(1.55e+00-3.04e+00)	a
119.082	1.07e+00(1.06e+00-1.18e+00)	ab	9.05e-01(9.00e-01-1.04e+00)	ab	8.46e-01(8.27e-01-8.93e-01)	a	4.84e+00(4.18e+00-5.19e+00)	d	2.52e+00(2.35e+00-2.59e+00)	bc	2.58e+00(2.58e+00-2.80e+00)	c	2.72e+00(2.66e+00-2.92e+00)	c	3.43e-07	8.73e+00(3.00e+00-1.84e+01)	ab	3.31e+01(5.04e+00-6.27e+01)	a	1.24e+01(1.02e+01-1.48e+01)	ab	8.55e+00(5.42e+00-2.01e+01)	ab	2.06e+00(1.20e+00-3.25e+00)	b	2.65e+00(1.45e+00-4.43e+00)	ab	1.17e+00(1.11e+00-1.32e+00)	ab	0.00777918	1.09e-01(1.07e-01-1.26e-01)	a	4.10e-01(3.89e-01-4.27e-01)	a	1.73e+00(1.65e+00-1.75e+00)	b	1.70e+00(1.53e+00-2.06e+00)	b	1.77e+00(1.42e+00-2.09e+00)	b	1.14e+00(1.13e+00-1.18e+00)	ab	5.57e-01(4.66e-01-5.57e-01)	a	3.34e-05	1.32e-01(1.02e-01-1.32e-01)	a	1.63e+00(1.44e+00-1.63e+00)	b
121.049	1.52e-01(1.16e-01-1.95e-01)	a	4.76e+00(4.61e+00-5.69e+00)	b	2.40e+00(2.13e+00-2.43e+00)	a	8.64e+00(8.16e+00-9.81e+00)	c	5.53e+00(5.49e+00-5.80e+00)	b	6.46e+00(6.45e+00-6.75e+00)	bc	4.04e-01(3.87e-01-4.27e-01)	a	9.49e-09	1.14e-02(0.00e+00-2.29e-01)	a	2.29e+00(9.50e-01-3.34e+00)	a	7.57e+00(4.23e+00-1.18e+01)	bc	1.36e+01(1.21e+01-1.53e+01)	c	4.54e+00(3.02e+00-4.87e+00)	ab	4.62e+00(4.55e+00-7.22e+00)	ab	6.61e-01(6.47e-01-7.77e-01)	a	3.03e-09	1.30e-01(1.26e-01-1.89e-01)	a	7.20e+00(6.72e+00-7.42e+00)	a	3.94e+01(3.58e+01-4.20e+01)	b	4.10e+01(3.48e+01-5.19e+01)	b	1.74e+01(1.30e+01-2.29e+01)	ab	8.43e+00(8.25e+00-8.44e+00)	a	5.64e-01(4.80e-01-5.76e-01)	a	1.92e-05	1.22e-01(1.09e-01-1.65e-01)	a	1.75e+01(1.55e+01-1.77e+01)	b
121.102	3.01e+01(2.94e+01-3.21e+01)	b	2.16e+00(2.15e+00-2.40e+00)	a	4.34e+00(4.33e+00-4.76e+00)	a	2.70e+01(2.21e+01-3.41e+01)	b	3.09e+00(3.09e+00-3.11e+00)	a	4.56e+00(4.41e+00-4.76e+00)	a	1.60e+01(1.54e+01-1.73e+01)	ab	3.22e-06	2.77e+02(1.24e+02-4.84e+02)	ab	6.08e+02(1.12e+02-1.17e+03)	b	2.11e+02(1.85e+02-2.43e+02)	ab	7.83e+01(1.27e+01-2.22e+02)	ab	5.75e+00(4.64e+00-8.38e+00)	a	7.33e+00(6.23e+00-9.22e+00)	a	7.40e+00(6.87e+00-7.80e+00)	ab	0.00172839	2.56e+00(2.35e+00-2.84e+00)	ab	2.55e+00(2.49e+00-2.62e+00)	ab	1.78e+00(1.70e+00-1.83e+00)	a	1.79e+00(1.71e+00-1.85e+00)	a	3.06e+00(2.60e+00-3.18e+00)	ab	2.58e+00(2.55e+00-2.62e+00)	ab	4.44e+00(3.76e+00-4.67e+00)	b	0.000509622	1.13e+00(1.05e+00-1.41e+00)	a	1.51e+00(1.51e+00-1.51e+00)	a
123.044	4.13e-01(3.77e-01-4.46e-01)	a	1.03e+00(9.96e-01-1.17e+00)	b	9.63e-01(9.30e-01-1.02e+00)	b	1.68e+00(1.64e+00-1.81e+00)	c	1.07e+00(1.06e+00-1.09e+00)	b	1.07e+00(1.07e+00-1.13e+00)	b	4.60e-01(4.21e-01-5.09e-01)	a	2.05e-08	8.37e-01(7.33e-01-9.29e-01)	a	2.76e+00(1.35e+00-4.85e+00)	a	2.60e+00(1.39e+00-4.58e+00)	a	2.48e+00(1.69e+00-2.78e+00)	a	9.89e-01(7.30e-01-1.24e+00)	a	2.11e+00(1.20e+00-2.50e+00)	a	9.05e-01(8.74e-01-9.70e-01)	a	0.457708	1.70e-01(1.56e-01-2.11e-01)	a	8.35e-01(8.31e-01-8.75e-01)	ab	2.25e+00(2.10e+00-2.40e+00)	c	1.95e+00(1.91e+00-2.19e+00)	c	1.39e+00(1.09e+00-1.64e+00)	bc	9.42e-01(9.35e-01-9.58e-01)	ab	4.12e-01(3.79e-01-4.16e-01)	a	6.24e-07	2.30e-01(1.64e-01-2.37e-01)	a	1.23e+00(1.17e+00-1.26e+00)	b
123.081	7.68e-01(7.63e-01-1.03e+00)	a	6.79e-01(6.52e-01-6.87e-01)	a	5.22e-01(5.15e-01-5.66e-01)	a	1.64e+00(1.45e+00-1.71e+00)	b	6.17e-01(5.77e-01-6.33e-01)	a	6.16e-01(5.42e-01-6.26e-01)	a	5.09e-01(4.91e-01-5.11e-01)	a	1.49e-05	2.13e+00(1.18e+00-3.63e+00)	ab	7.87e+00(3.05e+00-1.65e+01)	b	6.88e+00(4.74e+00-8.26e+00)	ab	2.68e+00(1.45e+00-7.60e+00)	ab	6.13e-01(4.40e-01-9.89e-01)	a	1.26e+00(5.31e-01-1.73e+00)	a	8.20e-01(8.15e-01-9.31e-01)	ab	0.000640876	5.70e-02(4.76e-02-5.73e-02)	a	5.79e-02(4.69e-02-6.42e-02)	a	3.80e-01(3.78e-01-3.85e-01)	b	3.26e-01(2.90e-01-3.96e-01)	b	1.56e-01(1.55e-01-2.24e-01)	ab	1.11e-01(9.51e-02-1.14e-01)	a	2.04e-01(1.81e-01-2.34e-01)	ab	9.23e-06	4.77e-02(2.99e-02-5.72e-02)	a	1.90e-01(1.54e-01-2.13e-01)	ab
123.117	1.34e+01(1.30e+01-1.48e+01)	d	4.12e+00(4.06e+00-4.38e+00)	ab	3.54e+00(3.30e+00-3.60e+00)	a	1.00e+01(8.90e+00-1.03e+01)	c	3.81e+00(3.74e+00-3.91e+00)	ab	6.97e+00(6.70e+00-7.31e+00)	bc	6.19e+00(6.02e+00-6.59e+00)	a c	2.17e-08	4.32e+01(3.72e+01-5.25e+01)	ab	1.01e+02(1.06e+01-1.93e+02)	b	2.62e+01(9.98e+00-3.73e+01)	ab	6.29e+00(4.77e+00-1.36e+01)	a	1.73e+00(9.27e-01-2.71e+00)	a	3.04e+00(1.48e+00-4.54e+00)	a	3.11e+00(3.00e+00-3.44e+00)	ab	0.00265954	2.07e-01(2.01e-01-2.35e-01)	a	1.93e-01(1.83e-01-2.78e-01)	a	2.66e-01(2.41e-01-2.81e-01)	a	2.12e-01(1.75e-01-2.79e-01)	a	1.44e-01(1.39e-01-1.72e-01)	a	1.35e-01(1.35e-01-1.38e-01)	a	1.46e-01(1.39e-01-2.09e-01)	a	0.294685	2.51e-01(2.22e-01-2.86e-01)	ab	6.02e-01(5.87e-01-6.41e-01)	c
125.06	2.33e-01(2.19e-01-2.45e-01)	a	1.20e+00(1.18e+00-1.31e+00)	a	3.13e+00(2.86e+00-3.21e+00)	ab	6.01e+00(5.98e+00-6.82e+00)	bc	1.00e+01(9.95e+00-1.03e+01)	c	6.21e+00(6.15e+00-8.68e+00)	c	3.33e+00(3.17e+00-3.62e+00)	ab	4.49e-07	8.76e-01(7.97e-01-2.66e+00)	a	3.24e+00(2.98e+00-5.28e+00)	ab	8.35e+00(6.69e+00-1.02e+01)	cd	1.04e+01(7.01e+00-1.21e+01)	d	8.32e+00(7.03e+00-9.00e+00)	cd	6.68e+00(5.66e+00-7.14e+00)	bcd	3.89e+00(3.67e+00-4.20e+00)	a c	3.31e-08	1.64e-01(1.26e-01-2.57e-01)	a	9.82e-01(9.76e-01-1.10e+00)	a	7.67e+00(7.45e+00-7.73e+00)	bc	1.17e+01(1.07e+01-1.33e+01)	c	9.45e+00(7.93e+00-1.05e+01)	bc	5.03e+00(4.99e+00-5.14e+00)	ab	2.29e+00(2.09e+00-2.37e+00)	a	2.98e-07	1.73e-01(1.25e-01-1.83e-01)	a	2.08e+00(1.96e+00-2.10e+00)	ab
125.097	9.44e-01(8.37e-01-9.74e-01)	a	1.01e+01(9.97e+00-1.15e+01)	c	1.09e+00(1.02e+00-1.20e+00)	a	8.43e+00(8.14e+00-9.47e+00)	bc	7.21e+00(7.06e+00-7.70e+00)	b	6.56e+00(5.95e+00-6.57e+00)	b	1.49e+00(1.47e+00-1.64e+00)	a	4e-09	5.33e+00(1.78e+00-1.18e+01)	ab	5.02e+01(1.08e+01-9.44e+01)	b	2.02e+01(3.62e+00-3.68e+01)	ab	8.19e+00(5.26e+00-9.62e+00)	ab	2.85e+00(1.24e+00-5.75e+00)	a	1.13e+01(4.79e+00-1.82e+01)	ab	1.14e+01(1.09e+01-1.27e+01)	ab	0.00498201	3.87e-01(3.30e-01-4.10e-01)	a	3.08e-01(2.90e-01-3.33e-01)	a	1.08e+00(9.66e-01-1.20e+00)	b	8.33e-01(6.92e-01-8.65e-01)	ab	6.08e-01(4.12e-01-7.60e-01)	ab	2.47e-01(2.06e-01-3.20e-01)	a	4.73e-01(3.95e-01-4.88e-01)	a	0.000977246	2.20e-01(1.92e-01-2.28e-01)	a	1.10e+00(1.02e+00-1.16e+00)	d
125.132	1.38e+00(1.34e+00-1.53e+00)	a	2.92e+00(2.86e+00-3.22e+00)	b	8.52e-01(8.48e-01-8.76e-01)	a	2.52e+00(2.26e+00-2.59e+00)	b	2.89e+00(2.85e+00-3.05e+00)	b	2.33e+00(2.32e+00-2.56e+00)	b	1.38e+00(1.33e+00-1.43e+00)	a	1.17e-07	3.54e+00(1.69e+00-6.13e+00)	a	8.67e+00(4.55e+00-1.45e+01)	a	5.72e+00(2.08e+00-9.98e+00)	a	2.68e+00(2.25e+00-3.05e+00)	a	9.35e-01(6.19e-01-1.39e+00)	a	1.87e+00(1.39e+00-2.52e+00)	a	1.73e+00(1.72e+00-2.04e+00)	a	0.0147202	1.23e-01(1.14e-01-1.39e-01)	a c	1.79e-01(1.75e-01-2.07e-01)	c	1.48e-01(1.24e-01-1.75e-01)	bc	8.38e-02(6.77e-02-1.16e-01)	a c	1.43e-02(1.13e-02-2.23e-02)	a	5.25e-02(3.93e-02-5.34e-02)	ab	5.75e-02(4.54e-02-8.27e-02)	ab	0.000285434	1.13e-01(9.15e-02-1.15e-01)	a	3.93e-01(3.58e-01-4.29e-01)	b
127.04	1.46e-01(1.37e-01-1.53e-01)	a	1.03e+00(1.01e+00-1.15e+00)	b	1.81e+00(1.70e+00-1.83e+00)	b	3.81e+00(3.77e+00-4.16e+00)	c	3.90e+00(3.85e+00-4.05e+00)	c	3.72e+00(3.67e+00-3.73e+00)	c	1.30e+00(1.24e+00-1.37e+00)	b	2.22e-12	4.67e-01(2.81e-01-6.44e-01)	a	2.04e+00(1.65e+00-2.91e+00)	ab	4.39e+00(2.87e+00-6.10e+00)	cd	5.19e+00(4.66e+00-5.68e+00)	d	2.51e+00(2.02e+00-2.84e+00)	bc	3.29e+00(2.83e+00-3.74e+00)	b d	1.57e+00(1.55e+00-1.80e+00)	ab	3.04e-08	1.56e-01(1.40e-01-1.70e-01)	a	8.76e-01(8.39e-01-9.10e-01)	ab	4.96e+00(4.84e+00-5.23e+00)	d	4.03e+00(3.83e+00-4.06e+00)	d	3.61e+00(3.04e+00-4.12e+00)	cd	2.09e+00(2.08e+00-2.15e+00)	bc	1.10e+00(1.04e+00-1.14e+00)	ab	1.28e-08	1.14e-01(1.03e-01-1.20e-01)	a	1.04e+00(1.03e+00-1.07e+00)	b
127.075	2.45e-01(2.25e-01-2.81e-01)	a	1.62e+00(1.58e+00-1.73e+00)	bc	1.65e+00(1.58e+00-1.68e+00)	bc	2.88e+00(2.80e+00-3.25e+00)	d	3.06e+00(3.05e+00-3.06e+00)	d	2.07e+00(2.05e+00-2.13e+00)	c	1.26e+00(1.25e+00-1.27e+00)	b	7.28e-10	9.50e-01(8.07e-01-1.06e+00)	a	5.30e+00(1.75e+00-1.02e+01)	ab	7.88e+00(5.49e+00-1.01e+01)	b	7.28e+00(6.51e+00-9.28e+00)	b	3.21e+00(2.76e+00-3.59e+00)	ab	3.34e+00(1.80e+00-4.23e+00)	ab	1.47e+00(1.33e+00-1.53e+00)	a	1.78e-05	1.46e-01(1.24e-01-1.63e-01)	a	5.23e-01(4.99e-01-5.26e-01)	a	3.16e+00(3.08e+00-3.22e+00)	d	3.42e+00(3.37e+00-3.52e+00)	d	2.01e+00(1.67e+00-2.31e+00)	c	1.71e+00(1.60e+00-1.73e+00)	bc	8.64e-01(7.60e-01-8.99e-01)	ab	1.18e-09	2.66e-01(1.61e-01-2.75e-01)	a	1.18e+00(1.09e+00-1.22e+00)	b
127.112	1.06e+00(1.03e+00-1.15e+00)	a	6.86e+00(6.76e+00-7.64e+00)	b	1.31e+00(1.21e+00-1.33e+00)	a	1.09e+01(1.06e+01-1.22e+01)	c	1.10e+01(1.09e+01-1.11e+01)	c	6.16e+00(6.07e+00-6.32e+00)	b	1.41e+00(1.35e+00-1.60e+00)	a	8.92e-11	1.03e+01(1.33e+00-2.68e+01)	a	6.39e+01(1.21e+01-1.31e+02)	a	3.24e+01(2.67e+00-6.38e+01)	a	1.56e+01(2.58e+00-3.08e+01)	a	6.51e+00(1.19e+00-1.32e+01)	a	1.45e+01(1.19e+01-2.04e+01)	a	3.07e+01(2.96e+01-3.46e+01)	a	0.0223227	6.13e-01(5.20e-01-6.33e-01)	bc	3.55e-01(2.90e-01-4.23e-01)	a c	1.41e+00(1.36e+00-1.51e+00)	d	6.44e-01(6.38e-01-7.00e-01)	c	3.30e-01(2.57e-01-3.47e-01)	a c	1.30e-01(1.06e-01-1.64e-01)	a	1.43e-01(1.25e-01-2.19e-01)	ab	1.06e-08	3.52e-01(3.07e-01-3.70e-01)	a	1.22e+00(1.17e+00-1.28e+00)	c
129.091	1.71e-01(1.52e-01-1.74e-01)	a	1.70e+00(1.63e+00-1.75e+00)	b	1.23e+00(1.17e+00-1.30e+00)	b	2.85e+00(2.80e+00-3.10e+00)	d	3.04e+00(3.04e+00-3.12e+00)	d	2.40e+00(2.32e+00-2.43e+00)	c	5.11e-01(4.71e-01-5.54e-01)	a	2.66e-12	1.77e+00(4.51e-01-3.02e+00)	a	9.53e+00(2.67e+00-1.78e+01)	a	7.00e+00(2.92e+00-1.19e+01)	a	4.78e+00(4.32e+00-5.24e+00)	a	1.85e+00(1.26e+00-2.38e+00)	a	7.41e+00(2.22e+00-1.03e+01)	a	1.92e+00(1.87e+00-2.18e+00)	a	0.020382	1.00e-01(9.70e-02-1.17e-01)	a	4.68e-01(4.53e-01-5.29e-01)	ab	2.52e+00(2.37e+00-2.54e+00)	c	2.27e+00(2.03e+00-2.65e+00)	c	1.41e+00(1.11e+00-1.60e+00)	bc	8.54e-01(8.11e-01-9.43e-01)	ab	3.18e-01(2.59e-01-3.79e-01)	ab	6.9e-07	8.70e-02(6.54e-02-1.13e-01)	a	8.51e-01(8.43e-01-8.65e-01)	b
129.128	1.84e-01(1.79e-01-2.09e-01)	a	4.74e+00(4.57e+00-5.28e+00)	c	2.71e-01(2.71e-01-2.84e-01)	a	2.29e+00(2.20e+00-2.69e+00)	b	5.42e+00(5.40e+00-5.65e+00)	c	2.93e+00(2.91e+00-2.99e+00)	b	5.45e-01(5.15e-01-5.79e-01)	a	4.55e-11	8.37e+00(2.25e-01-2.50e+01)	a	1.35e+01(6.80e+00-2.21e+01)	a	1.27e+01(1.57e+00-2.56e+01)	a	4.08e+00(1.04e+00-7.15e+00)	a	1.40e+00(5.32e-01-2.78e+00)	a	9.48e+00(3.90e+00-1.38e+01)	a	5.38e+00(5.14e+00-5.97e+00)	a	0.110388	1.57e-01(1.33e-01-1.67e-01)	ab	2.72e-01(2.49e-01-2.91e-01)	bc	3.11e-01(2.94e-01-3.63e-01)	c	2.13e-01(1.95e-01-2.19e-01)	a c	1.93e-01(1.51e-01-2.01e-01)	ab	9.49e-02(8.29e-02-1.08e-01)	a	1.25e-01(1.02e-01-1.47e-01)	ab	0.000170335	6.46e-02(6.08e-02-7.07e-02)	a	5.09e-01(4.49e-01-5.15e-01)	c
131.072	1.35e-01(1.34e-01-1.71e-01)	a	5.11e-01(4.73e-01-5.30e-01)	ab	1.00e+00(9.51e-01-1.04e+00)	b	2.36e+00(2.32e+00-2.74e+00)	c	1.94e+00(1.94e+00-2.00e+00)	c	2.05e+00(2.05e+00-2.06e+00)	c	6.15e-01(6.01e-01-6.63e-01)	ab	7.27e-10	1.28e+00(3.88e-01-2.55e+00)	a	3.36e+00(6.93e-01-6.16e+00)	a	3.73e+00(2.39e+00-5.08e+00)	a	4.71e+00(3.87e+00-5.06e+00)	a	1.37e+00(1.09e+00-1.65e+00)	a	1.72e+00(1.45e+00-1.84e+00)	a	6.99e-01(6.65e-01-7.33e-01)	a	0.0022989	1.53e-01(1.36e-01-1.63e-01)	a	4.05e-01(3.89e-01-4.07e-01)	a	3.23e+00(3.06e+00-3.35e+00)	b	3.10e+00(2.81e+00-3.80e+00)	b	1.88e+00(1.44e+00-2.12e+00)	ab	1.20e+00(1.18e+00-1.25e+00)	a	5.35e-01(4.69e-01-5.44e-01)	a	1.74e-06	1.15e-01(1.05e-01-1.24e-01)	a	8.88e-01(8.31e-01-9.11e-01)	ab
131.107	1.87e-01(1.60e-01-2.21e-01)	a	3.05e+00(3.04e+00-3.34e+00)	c	5.17e-01(4.68e-01-5.31e-01)	a	1.97e+00(1.86e+00-1.98e+00)	b	3.65e+00(3.62e+00-3.65e+00)	c	4.70e+00(4.70e+00-4.86e+00)	d	4.43e-01(4.31e-01-4.43e-01)	a	9.13e-15	4.02e+00(1.68e+00-6.90e+00)	ab	1.26e+01(3.47e+00-2.72e+01)	b	1.04e+01(6.14e+00-1.39e+01)	ab	4.86e+00(4.51e+00-5.62e+00)	ab	1.20e+00(7.80e-01-2.05e+00)	a	5.67e+00(3.12e+00-7.72e+00)	ab	3.99e+00(3.89e+00-4.59e+00)	ab	0.00633854	1.24e-01(1.11e-01-2.11e-01)	a	5.96e-01(4.82e-01-6.94e-01)	a	3.62e-01(3.58e-01-6.21e-01)	a	5.37e-01(4.35e-01-7.46e-01)	a	3.57e-01(3.46e-01-4.47e-01)	a	1.70e-01(1.51e-01-1.95e-01)	a	3.56e-01(2.86e-01-4.14e-01)	a	0.0733368	1.72e-01(1.19e-01-1.88e-01)	a	3.72e-01(3.50e-01-4.40e-01)	ab
135.053	3.23e-01(2.39e-01-3.92e-01)	a	8.59e-01(8.01e-01-9.54e-01)	b	4.59e-01(3.61e-01-4.82e-01)	a	1.08e+00(1.04e+00-1.23e+00)	bc	1.71e+00(1.62e+00-1.74e+00)	d	1.34e+00(1.34e+00-1.41e+00)	cd	3.49e-02(1.74e-02-5.79e-02)	a	3.24e-09	5.24e-01(0.00e+00-8.68e-01)	a	2.17e+00(6.91e-01-2.77e+00)	a	2.04e+00(1.42e+00-3.12e+00)	a	1.70e+00(1.52e+00-2.02e+00)	a	5.08e-01(4.51e-01-6.98e-01)	a	1.14e+00(6.24e-01-1.57e+00)	a	4.22e-01(4.15e-01-4.45e-01)	a	0.0905819	1.24e-01(1.10e-01-1.51e-01)	a	3.90e-01(3.85e-01-4.23e-01)	ab	1.66e+00(1.54e+00-1.73e+00)	bc	1.95e+00(1.71e+00-2.49e+00)	c	1.27e+00(9.59e-01-1.64e+00)	a c	6.39e-01(6.14e-01-6.43e-01)	ab	1.43e-01(1.28e-01-1.54e-01)	a	0.000103253	1.20e-01(1.01e-01-1.20e-01)	a	2.58e+00(2.19e+00-2.67e+00)	b
135.117	5.99e+01(5.84e+01-6.49e+01)	c	5.99e+00(5.92e+00-6.47e+00)	a	3.01e+01(2.87e+01-3.13e+01)	ab	6.21e+01(5.46e+01-7.37e+01)	c	6.18e+00(6.14e+00-6.23e+00)	a	9.39e+00(9.27e+00-9.87e+00)	a	5.48e+01(5.37e+01-5.85e+01)	bc	1.42e-07	3.71e+02(2.10e+02-5.73e+02)	ab	1.11e+03(1.53e+02-2.05e+03)	a	3.56e+02(2.23e+02-3.64e+02)	ab	1.21e+02(2.80e+01-3.11e+02)	ab	1.41e+01(3.64e+00-2.58e+01)	b	1.29e+01(3.44e+00-1.89e+01)	b	1.06e+01(1.00e+01-1.13e+01)	ab	0.00222136	9.83e-01(9.33e-01-9.96e-01)	a	1.07e+00(1.05e+00-1.60e+00)	a	1.22e+00(1.14e+00-1.45e+00)	a	1.57e+00(1.38e+00-1.68e+00)	a	1.39e+00(1.29e+00-1.60e+00)	a	9.96e-01(9.79e-01-1.03e+00)	a	2.11e+00(1.89e+00-2.68e+00)	a	0.0338455	7.83e-01(5.55e-01-7.98e-01)	a	8.09e-01(7.57e-01-8.70e-01)	ab
138.137	5.39e+03(5.39e+03-5.85e+03)	c	6.33e+01(5.95e+01-6.66e+01)	a	6.19e+02(5.97e+02-6.88e+02)	a	3.31e+03(2.69e+03-4.52e+03)	bc	1.43e+02(1.42e+02-1.45e+02)	a	2.32e+02(2.21e+02-2.51e+02)	a	2.31e+03(2.22e+03-2.47e+03)	ab	7.93e-07	3.70e+04(1.89e+04-5.93e+04)	ab	5.64e+04(1.53e+04-9.89e+04)	b	2.44e+04(2.41e+04-2.70e+04)	ab	9.02e+03(8.02e+02-2.60e+04)	ab	2.52e+02(5.83e+01-5.82e+02)	a	2.58e+02(3.07e+01-4.35e+02)	a	5.19e+02(4.78e+02-5.50e+02)	ab	0.000481246	7.95e+00(7.87e+00-1.56e+01)	a	6.97e+00(6.07e+00-4.53e+01)	a	8.98e+00(7.03e+00-1.30e+01)	a	1.28e+01(9.47e+00-1.85e+01)	a	8.39e+00(7.76e+00-9.44e+00)	a	5.90e+00(5.41e+00-5.95e+00)	a	1.31e+01(1.29e+01-4.30e+01)	a	0.612731	2.05e+01(1.17e+01-2.18e+01)	a	5.99e+00(5.88e+00-8.52e+00)	a
139.114	1.22e+01(1.20e+01-1.38e+01)	a	2.74e+01(2.69e+01-3.21e+01)	b	6.23e+00(6.07e+00-6.49e+00)	a	3.53e+01(3.36e+01-3.86e+01)	b	1.29e+01(1.26e+01-1.40e+01)	a	1.03e+01(1.02e+01-1.05e+01)	a	4.53e+00(4.31e+00-4.78e+00)	a	1.72e-08	2.15e+01(2.63e+00-3.56e+01)	ab	1.66e+02(3.56e+01-3.29e+02)	b	3.62e+01(7.96e+00-6.40e+01)	ab	2.64e+01(1.06e+01-2.87e+01)	a	7.61e+00(3.51e+00-1.34e+01)	a	3.71e+01(1.18e+01-5.80e+01)	ab	2.64e+01(2.54e+01-2.93e+01)	ab	0.00321587	1.09e+00(9.86e-01-1.23e+00)	bc	5.44e-01(5.25e-01-8.54e-01)	a c	1.44e+00(1.37e+00-1.52e+00)	c	5.23e-01(4.33e-01-5.72e-01)	ab	3.82e-01(3.56e-01-3.96e-01)	ab	1.35e-01(1.28e-01-1.36e-01)	a	3.42e-01(3.35e-01-7.22e-01)	a c	0.000242058	5.80e-01(4.99e-01-5.93e-01)	a	3.65e+00(3.58e+00-3.81e+00)	d
141.127	1.50e+00(1.42e+00-1.59e+00)	b	3.35e+00(3.25e+00-3.63e+00)	d	6.99e-01(6.42e-01-7.05e-01)	a	2.37e+00(2.30e+00-2.64e+00)	c	2.61e+00(2.51e+00-2.62e+00)	c	1.53e+00(1.50e+00-1.56e+00)	b	4.03e-01(3.79e-01-4.29e-01)	a	7.48e-10	3.20e+00(1.05e+00-7.64e+00)	a	9.75e+00(3.02e+00-1.79e+01)	a	6.11e+00(1.51e+00-1.13e+01)	a	3.15e+00(1.28e+00-4.76e+00)	a	1.80e+00(5.30e-01-3.39e+00)	a	3.30e+00(1.76e+00-4.47e+00)	a	3.87e+00(3.77e+00-4.38e+00)	a	0.0441364	1.57e-01(1.41e-01-1.90e-01)	ab	1.60e-01(1.60e-01-1.66e-01)	ab	3.39e-01(3.06e-01-3.68e-01)	c	2.33e-01(2.25e-01-2.50e-01)	bc	2.11e-01(1.82e-01-2.36e-01)	a c	1.05e-01(1.02e-01-1.07e-01)	a	8.24e-02(7.64e-02-8.39e-02)	a	1.83e-05	2.07e-01(1.77e-01-2.22e-01)	ab	7.49e-01(6.76e-01-7.75e-01)	c
143.106	2.56e-01(2.28e-01-2.64e-01)	a	1.75e+00(1.74e+00-1.83e+00)	c	7.14e-01(6.87e-01-7.19e-01)	b	2.73e+00(2.71e+00-2.89e+00)	d	3.59e+00(3.50e+00-3.67e+00)	e	1.94e+00(1.93e+00-1.95e+00)	c	5.10e-01(4.75e-01-5.54e-01)	ab	1.36e-14	3.30e+00(1.51e+00-5.82e+00)	a	1.24e+01(2.79e+00-2.48e+01)	a	5.83e+00(2.03e+00-1.52e+01)	a	4.47e+00(2.48e+00-6.68e+00)	a	1.98e+00(7.74e-01-3.44e+00)	a	3.13e+00(2.53e+00-4.15e+00)	a	4.34e+00(4.16e+00-4.73e+00)	a	0.0318464	1.11e-01(1.06e-01-1.45e-01)	a	2.94e-01(2.62e-01-3.71e-01)	a	6.78e-01(6.66e-01-7.48e-01)	b	7.17e-01(6.86e-01-8.52e-01)	b	5.28e-01(4.43e-01-5.72e-01)	ab	3.30e-01(3.24e-01-3.38e-01)	a	1.88e-01(1.85e-01-2.60e-01)	a	1.33e-05	1.44e-01(1.02e-01-1.51e-01)	a	4.07e-01(4.04e-01-4.78e-01)	c
143.143	2.60e-01(2.59e-01-3.16e-01)	a	5.93e+00(5.82e+00-6.57e+00)	c	7.44e-01(7.11e-01-7.62e-01)	a	2.43e+00(2.26e+00-2.84e+00)	b	5.49e+00(5.22e+00-5.67e+00)	c	2.71e+00(2.66e+00-2.77e+00)	b	7.85e-01(7.51e-01-8.10e-01)	a	1.63e-10	1.39e+01(7.57e-01-3.64e+01)	a	9.17e+00(7.92e+00-1.20e+01)	a	7.93e+00(2.66e+00-1.77e+01)	a	4.55e+00(2.46e+00-7.01e+00)	a	2.05e+00(1.43e+00-2.90e+00)	a	5.47e+00(2.97e+00-7.70e+00)	a	3.82e+00(3.65e+00-4.27e+00)	a	0.0729693	2.56e-01(2.10e-01-2.58e-01)	ab	4.14e-01(3.62e-01-4.28e-01)	bc	5.15e-01(4.83e-01-5.29e-01)	c	3.50e-01(3.30e-01-3.66e-01)	bc	2.24e-01(1.78e-01-2.68e-01)	ab	1.24e-01(1.23e-01-1.39e-01)	a	1.05e-01(1.00e-01-1.15e-01)	a	2.65e-06	1.53e-01(1.31e-01-1.55e-01)	a	7.49e-01(7.12e-01-8.91e-01)	d
145.12	2.17e-01(2.15e-01-2.27e-01)	a	9.34e-01(9.30e-01-1.03e+00)	c	3.16e-01(3.11e-01-3.29e-01)	a	1.00e+00(9.55e-01-1.03e+00)	c	1.40e+00(1.38e+00-1.41e+00)	d	1.13e+00(1.08e+00-1.14e+00)	c	5.48e-01(5.21e-01-5.79e-01)	b	8.89e-12	1.43e+00(1.35e+00-2.28e+00)	a	5.71e+00(1.31e+00-1.11e+01)	a	6.61e+00(1.82e+00-1.21e+01)	a	3.34e+00(2.32e+00-4.23e+00)	a	8.42e-01(5.04e-01-1.43e+00)	a	2.99e+00(8.26e-01-3.97e+00)	a	2.46e+00(2.32e+00-2.87e+00)	a	0.0305784	1.43e-01(1.14e-01-1.48e-01)	a	3.45e-01(3.16e-01-3.51e-01)	ab	7.16e-01(6.59e-01-9.19e-01)	bc	7.86e-01(7.43e-01-9.14e-01)	c	5.62e-01(4.35e-01-6.19e-01)	a c	3.40e-01(3.30e-01-3.64e-01)	a c	2.05e-01(1.76e-01-2.17e-01)	a	0.000100469	1.49e-01(9.90e-02-1.55e-01)	a	4.09e-01(4.07e-01-4.47e-01)	cd
147.116	2.05e-01(1.99e-01-2.57e-01)	a	2.65e-01(2.53e-01-2.80e-01)	a	1.76e-01(1.72e-01-1.84e-01)	a	8.02e-01(7.41e-01-8.20e-01)	b	6.31e-01(6.00e-01-6.66e-01)	b	5.60e-01(5.47e-01-6.16e-01)	b	6.50e-01(6.27e-01-6.98e-01)	b	1.93e-08	4.08e+00(1.75e+00-7.76e+00)	ab	1.05e+01(1.36e+00-1.98e+01)	b	3.43e+00(1.90e+00-4.11e+00)	ab	1.24e+00(1.14e+00-2.12e+00)	ab	3.47e-01(2.16e-01-5.41e-01)	a	5.70e-01(4.84e-01-1.11e+00)	ab	4.92e-01(4.82e-01-5.99e-01)	ab	0.00662075	5.98e-02(4.33e-02-6.21e-02)	a	9.64e-02(8.40e-02-1.08e-01)	a c	2.37e-01(2.13e-01-2.40e-01)	c	2.04e-01(2.00e-01-2.52e-01)	c	1.76e-01(1.53e-01-2.34e-01)	bc	1.13e-01(1.06e-01-1.18e-01)	a c	7.51e-02(7.36e-02-7.68e-02)	ab	0.000246151	5.56e-02(5.02e-02-5.90e-02)	a	2.80e-01(2.58e-01-3.13e-01)	b
149.096	7.19e-01(6.74e-01-7.44e-01)	ab	6.67e-01(6.17e-01-7.11e-01)	ab	1.17e+00(1.08e+00-1.21e+00)	bc	1.62e+00(1.55e+00-1.75e+00)	c	2.53e+00(2.26e+00-2.64e+00)	d	1.57e+00(1.54e+00-1.65e+00)	c	3.35e-01(2.88e-01-3.68e-01)	a	2.09e-08	2.75e+00(1.58e+00-2.99e+00)	a	3.09e+01(4.42e+00-6.49e+01)	b	5.96e+00(2.53e+00-1.04e+01)	ab	3.42e+00(2.89e+00-3.71e+00)	a	1.17e+00(4.21e-01-1.99e+00)	a	5.71e+00(1.34e+00-7.86e+00)	ab	2.80e+00(2.70e+00-3.06e+00)	ab	0.00246335	1.26e-01(1.18e-01-1.31e-01)	a	1.90e-01(1.75e-01-2.47e-01)	ab	3.42e-01(3.38e-01-3.86e-01)	b	3.59e-01(3.58e-01-4.29e-01)	b	3.18e-01(2.61e-01-3.68e-01)	ab	1.88e-01(1.88e-01-2.02e-01)	ab	1.61e-01(1.59e-01-2.23e-01)	ab	0.00152109	1.45e-01(1.08e-01-1.76e-01)	a	2.02e+00(1.64e+00-2.14e+00)	b
151.113	4.81e+01(4.53e+01-5.32e+01)	d	7.82e+00(7.37e+00-7.92e+00)	ab	2.23e+01(2.06e+01-2.24e+01)	c	1.73e+01(1.69e+01-1.81e+01)	bc	2.60e+00(2.57e+00-2.73e+00)	a	3.65e+00(3.63e+00-3.67e+00)	a	3.10e+00(2.91e+00-3.17e+00)	a	3.24e-10	7.38e+01(1.35e+01-1.47e+02)	a	6.42e+01(1.54e+01-1.22e+02)	a	2.76e+01(1.14e+01-4.48e+01)	a	7.62e+00(5.13e+00-1.37e+01)	a	2.51e+00(1.80e+00-3.50e+00)	a	4.20e+00(2.17e+00-5.06e+00)	a	2.43e+00(2.39e+00-2.50e+00)	a	0.00342137	5.12e-01(4.84e-01-5.77e-01)	a	3.53e-01(3.44e-01-5.66e-01)	a	6.95e-01(6.74e-01-7.87e-01)	a	9.12e-01(8.03e-01-1.05e+00)	a	7.58e-01(5.99e-01-7.65e-01)	a	4.53e-01(4.51e-01-4.59e-01)	a	3.96e-01(3.93e-01-5.46e-01)	a	0.0450385	6.04e-01(4.21e-01-6.32e-01)	a	5.37e-01(5.29e-01-5.90e-01)	a
153.128	1.43e+01(1.40e+01-1.60e+01)	cd	6.98e+00(6.84e+00-7.45e+00)	a	1.15e+01(1.08e+01-1.17e+01)	a c	2.00e+01(1.86e+01-2.06e+01)	d	1.04e+01(1.04e+01-1.06e+01)	ab	1.20e+01(1.20e+01-1.22e+01)	bc	1.44e+01(1.38e+01-1.50e+01)	bc	5.89e-07	4.60e+01(4.03e+01-5.35e+01)	ab	1.58e+02(2.39e+01-3.42e+02)	b	4.47e+01(1.49e+01-7.38e+01)	ab	2.03e+01(1.88e+01-2.97e+01)	ab	9.38e+00(2.68e+00-1.71e+01)	a	4.19e+01(2.37e+00-5.85e+01)	ab	3.12e+01(3.02e+01-3.47e+01)	ab	0.00658159	2.99e-01(2.97e-01-3.38e-01)	a	2.37e-01(2.28e-01-5.50e-01)	a	3.70e-01(3.36e-01-4.05e-01)	a	4.95e-01(4.14e-01-5.34e-01)	a	3.35e-01(3.20e-01-3.83e-01)	a	1.66e-01(1.64e-01-1.71e-01)	a	3.39e-01(3.18e-01-6.41e-01)	a	0.47575	2.30e-01(1.73e-01-3.11e-01)	a	4.29e-01(3.92e-01-4.53e-01)	ab
155.106	5.06e-01(4.92e-01-5.07e-01)	a	1.64e+00(1.62e+00-1.65e+00)	c	5.17e-01(5.16e-01-5.44e-01)	a	2.21e+00(2.21e+00-2.35e+00)	d	2.31e+00(2.30e+00-2.38e+00)	d	1.11e+00(1.05e+00-1.11e+00)	b	4.00e-01(3.45e-01-4.03e-01)	a	2.28e-14	2.56e+00(8.38e-01-4.35e+00)	a	7.23e+00(1.90e+00-1.59e+01)	a	4.64e+00(1.26e+00-8.23e+00)	a	2.37e+00(1.52e+00-3.45e+00)	a	1.07e+00(5.06e-01-1.88e+00)	a	2.87e+00(1.40e+00-3.00e+00)	a	2.89e+00(2.73e+00-2.89e+00)	a	0.0260042	1.04e-01(9.90e-02-1.77e-01)	a	1.42e-01(1.39e-01-2.42e-01)	a	3.35e-01(3.34e-01-3.87e-01)	a	4.36e-01(3.74e-01-4.61e-01)	a	1.97e-01(1.72e-01-2.36e-01)	a	1.72e-01(1.71e-01-1.81e-01)	a	1.89e-01(1.78e-01-2.35e-01)	a	0.00529051	1.86e-01(1.29e-01-1.88e-01)	a	2.85e-01(2.47e-01-2.85e-01)	ab
155.143	4.07e-01(3.67e-01-4.34e-01)	a	2.13e+00(2.08e+00-2.26e+00)	d	3.39e-01(3.11e-01-3.41e-01)	a	1.35e+00(1.27e+00-1.44e+00)	c	1.69e+00(1.62e+00-1.73e+00)	c	9.38e-01(9.25e-01-9.68e-01)	b	7.04e-01(6.72e-01-7.32e-01)	ab	3.97e-11	4.84e+00(4.25e+00-5.57e+00)	ab	1.08e+01(2.56e+00-1.99e+01)	b	4.58e+00(1.31e+00-8.54e+00)	ab	2.76e+00(2.37e+00-3.10e+00)	ab	8.06e-01(2.66e-01-1.63e+00)	a	2.42e+00(8.15e-01-3.42e+00)	ab	2.80e+00(2.60e+00-3.01e+00)	ab	0.00657744	9.77e-02(9.11e-02-1.21e-01)	a	1.21e-01(1.06e-01-1.37e-01)	a	2.21e-01(1.89e-01-2.44e-01)	a	2.22e-01(1.69e-01-2.43e-01)	a	1.44e-01(1.12e-01-1.52e-01)	a	6.65e-02(6.50e-02-7.54e-02)	a	9.73e-02(8.36e-02-1.23e-01)	a	0.0155441	1.03e-01(7.91e-02-1.20e-01)	a	2.61e-01(2.60e-01-2.77e-01)	b
157.089	7.99e-02(7.81e-02-9.27e-02)	a	3.83e-01(3.72e-01-4.36e-01)	b	4.00e-01(3.61e-01-4.33e-01)	b	8.72e-01(8.02e-01-9.94e-01)	c	4.57e-01(4.18e-01-4.70e-01)	b	3.54e-01(3.47e-01-3.59e-01)	ab	1.49e-01(1.42e-01-1.61e-01)	ab	4.28e-07	8.45e-01(4.52e-01-1.39e+00)	ab	1.06e+01(1.49e+00-2.11e+01)	b	2.87e+00(7.58e-01-5.32e+00)	ab	1.04e+00(8.94e-01-1.30e+00)	ab	3.96e-01(2.65e-01-5.25e-01)	a	7.27e+00(5.12e-01-1.02e+01)	ab	5.30e-01(4.68e-01-5.80e-01)	ab	0.00511408	3.99e-02(3.98e-02-4.64e-02)	a	1.06e-01(9.85e-02-1.12e-01)	a	2.89e-01(2.41e-01-2.98e-01)	ab	3.76e-01(3.30e-01-4.76e-01)	b	1.10e-01(1.06e-01-1.47e-01)	a	1.04e-01(1.01e-01-1.04e-01)	a	4.06e-02(3.63e-02-4.61e-02)	a	4.45e-05	4.19e-02(4.15e-02-4.24e-02)	a	1.70e-01(1.57e-01-1.72e-01)	c
159.137	1.45e-01(1.42e-01-1.46e-01)	a	9.20e-01(9.08e-01-1.07e+00)	b	3.10e-01(2.88e-01-3.16e-01)	a	8.68e-01(8.32e-01-9.01e-01)	b	1.72e+00(1.69e+00-1.74e+00)	c	1.01e+00(9.71e-01-1.03e+00)	b	3.82e-01(3.58e-01-3.85e-01)	a	1.12e-11	6.75e-01(5.96e-01-8.73e-01)	a	9.84e+00(9.57e-01-2.10e+01)	a	1.28e+01(1.73e+00-2.55e+01)	a	5.32e+00(1.59e+00-9.60e+00)	a	1.04e+00(4.44e-01-1.95e+00)	a	3.59e+00(6.70e-01-5.38e+00)	a	4.45e+00(4.29e+00-5.35e+00)	a	0.0342277	1.35e-01(1.12e-01-1.35e-01)	a	3.09e-01(2.84e-01-3.09e-01)	ab	5.66e-01(5.30e-01-7.14e-01)	b	6.00e-01(5.69e-01-7.28e-01)	b	4.64e-01(3.61e-01-5.07e-01)	ab	3.18e-01(3.15e-01-3.26e-01)	ab	1.74e-01(1.66e-01-1.80e-01)	a	0.000166287	1.26e-01(9.92e-02-1.57e-01)	a	3.64e-01(3.59e-01-4.16e-01)	b d
161.129	3.26e-01(3.20e-01-4.35e-01)	a	4.41e-01(4.34e-01-5.43e-01)	a	3.04e-01(2.85e-01-3.11e-01)	a	3.68e+00(2.95e+00-3.71e+00)	b	1.37e+00(1.32e+00-1.38e+00)	a	8.54e-01(8.37e-01-9.16e-01)	a	6.61e-01(6.51e-01-7.15e-01)	a	5.7e-07	4.71e+00(2.77e+00-7.92e+00)	ab	1.81e+01(5.23e+00-3.45e+01)	a	1.94e+01(1.10e+01-2.38e+01)	ab	8.15e+00(5.53e+00-2.32e+01)	ab	8.75e-01(4.15e-01-1.76e+00)	b	1.15e+00(1.12e+00-2.00e+00)	ab	7.93e-01(7.34e-01-9.08e-01)	ab	0.000781938	6.09e-02(5.66e-02-7.34e-02)	a	1.00e-01(8.39e-02-1.19e-01)	a	3.11e-01(3.04e-01-3.47e-01)	c	2.51e-01(2.35e-01-2.92e-01)	bc	1.73e-01(1.52e-01-2.01e-01)	ab	1.17e-01(1.12e-01-1.20e-01)	a	8.59e-02(8.04e-02-8.78e-02)	a	2.17e-06	7.17e-02(6.21e-02-7.19e-02)	a	2.92e-01(2.63e-01-2.98e-01)	bc
163.148	4.52e-01(4.19e-01-4.90e-01)	a	2.19e-01(2.04e-01-2.39e-01)	a	2.24e-01(2.10e-01-2.29e-01)	a	1.24e+00(1.01e+00-1.35e+00)	b	2.67e-01(2.59e-01-2.69e-01)	a	3.15e-01(3.10e-01-3.46e-01)	a	9.88e-01(9.73e-01-1.04e+00)	b	1.47e-06	4.73e+00(2.63e+00-6.25e+00)	ab	1.82e+01(2.10e+00-3.49e+01)	b	5.21e+00(1.85e+00-7.76e+00)	ab	1.22e+00(5.03e-01-3.26e+00)	a	2.78e-01(1.99e-01-3.62e-01)	a	2.83e-01(1.44e-01-4.41e-01)	a	3.45e-01(3.36e-01-3.84e-01)	ab	0.00309494	5.90e-02(5.49e-02-7.26e-02)	a	9.10e-02(8.38e-02-9.41e-02)	a	1.03e-01(1.03e-01-1.11e-01)	a	1.30e-01(9.43e-02-1.39e-01)	a	9.59e-02(7.63e-02-1.01e-01)	a	6.65e-02(6.42e-02-7.21e-02)	a	4.74e-02(4.02e-02-5.02e-02)	a	0.0276561	6.22e-02(5.71e-02-6.25e-02)	a	7.90e-02(6.55e-02-8.13e-02)	ab
175.147	1.11e-01(1.04e-01-1.18e-01)	ab	1.21e-01(1.18e-01-1.41e-01)	ab	5.52e-02(5.33e-02-6.45e-02)	a	3.04e-01(2.61e-01-3.13e-01)	c	4.18e-01(4.16e-01-4.35e-01)	d	2.76e-01(2.67e-01-2.96e-01)	c	1.65e-01(1.59e-01-1.78e-01)	b	3.72e-09	4.61e+00(1.23e+00-1.03e+01)	ab	1.40e+01(9.15e-01-2.77e+01)	b	3.36e+00(2.00e+00-4.08e+00)	ab	9.10e-01(6.70e-01-1.94e+00)	ab	1.63e-01(1.00e-01-2.83e-01)	a	2.54e-01(1.30e-01-4.02e-01)	ab	2.25e-01(2.03e-01-2.35e-01)	ab	0.00720874	3.43e-02(2.65e-02-4.45e-02)	a	2.67e-02(1.75e-02-3.05e-02)	a	8.31e-02(6.02e-02-8.54e-02)	a	7.02e-02(5.76e-02-7.40e-02)	a	3.56e-02(3.36e-02-4.46e-02)	a	1.91e-02(1.75e-02-2.12e-02)	a	1.48e-02(1.22e-02-1.76e-02)	a	0.00399708	2.66e-02(2.46e-02-3.05e-02)	a	1.58e-01(1.42e-01-1.70e-01)	c
179.145	1.33e+00(1.06e+00-2.08e+00)	a	3.08e-01(3.04e-01-3.67e-01)	a	1.36e+00(1.33e+00-1.62e+00)	a	2.04e+01(1.54e+01-2.27e+01)	b	1.08e+00(1.06e+00-1.08e+00)	a	1.57e+00(1.53e+00-1.73e+00)	a	2.67e+00(2.36e+00-3.01e+00)	a	2e-05	1.75e+01(1.05e+01-2.88e+01)	a	1.07e+02(3.50e+01-2.04e+02)	a	1.30e+02(9.06e+01-1.37e+02)	a	4.59e+01(5.67e+00-2.04e+02)	a	1.19e+00(3.21e-01-2.71e+00)	a	1.01e+00(2.54e-01-2.09e+00)	a	8.51e-01(7.40e-01-9.45e-01)	a	0.000875646	9.46e-02(9.01e-02-1.37e-01)	a	1.22e-01(1.16e-01-2.01e-01)	a	2.59e-01(2.15e-01-2.87e-01)	a	2.92e-01(2.76e-01-3.05e-01)	a	1.78e-01(1.52e-01-2.11e-01)	a	1.56e-01(1.50e-01-1.56e-01)	a	1.06e-01(9.56e-02-1.30e-01)	a	0.0158454	1.19e-01(1.07e-01-1.36e-01)	a	1.56e-01(1.54e-01-1.89e-01)	ab
191.18	2.54e-01(2.42e-01-2.63e-01)	a	1.44e-01(1.38e-01-1.55e-01)	a	1.04e-01(9.75e-02-1.09e-01)	a	9.70e-01(8.14e-01-1.13e+00)	b	2.72e-01(2.62e-01-2.74e-01)	a	4.86e-01(4.84e-01-4.93e-01)	a	3.28e-01(3.20e-01-3.67e-01)	a	9.55e-06	8.40e+00(6.09e+00-1.08e+01)	ab	9.45e+01(4.51e+00-1.99e+02)	a	1.82e+01(2.27e+00-3.41e+01)	ab	1.08e+00(6.83e-01-2.60e+00)	b	1.69e-01(1.00e-01-3.04e-01)	b	1.67e-01(7.36e-02-2.57e-01)	ab	4.13e-01(3.61e-01-4.57e-01)	ab	0.00387731	5.48e-02(4.66e-02-5.73e-02)	ab	4.22e-02(3.79e-02-4.30e-02)	ab	5.28e-02(5.04e-02-5.71e-02)	ab	7.33e-02(6.19e-02-7.60e-02)	b	5.15e-02(4.33e-02-5.19e-02)	ab	3.71e-02(3.46e-02-3.95e-02)	ab	2.23e-02(2.19e-02-3.11e-02)	a	0.00454798	3.87e-02(3.64e-02-3.96e-02)	a	3.77e-02(3.53e-02-3.86e-02)	a
205.196	4.13e+01(4.11e+01-4.72e+01)	b	1.02e+01(9.51e+00-1.06e+01)	a	1.55e+01(1.50e+01-1.67e+01)	a	7.25e+01(6.16e+01-7.77e+01)	b	8.43e+00(8.34e+00-8.76e+00)	a	1.40e+01(1.40e+01-1.42e+01)	a	6.56e+01(6.38e+01-6.91e+01)	b	3.11e-08	3.70e+02(2.08e+02-5.43e+02)	a	3.35e+02(7.68e+01-6.34e+02)	ab	1.31e+02(8.02e+01-1.72e+02)	ab	4.98e+01(2.78e+01-9.93e+01)	ab	2.25e+01(1.56e+01-2.93e+01)	b	6.03e+00(1.30e+00-7.09e+00)	b	2.34e+00(2.26e+00-2.51e+00)	ab	0.000205041	1.38e+00(1.27e+00-1.48e+00)	a	3.49e-01(3.04e-01-1.22e+00)	a	3.63e-01(3.18e-01-5.17e-01)	a	7.89e-01(5.74e-01-8.60e-01)	a	4.45e-01(4.11e-01-4.68e-01)	a	1.67e-01(1.63e-01-1.75e-01)	a	3.06e-01(2.91e-01-8.68e-01)	a	0.15598	1.13e+00(8.12e-01-1.14e+00)	b	3.79e-01(3.52e-01-4.10e-01)	ab
217.196	1.06e+00(1.01e+00-1.22e+00)	b	4.17e-02(3.84e-02-4.83e-02)	a	2.73e-02(2.66e-02-3.18e-02)	a	3.50e-01(2.58e-01-6.67e-01)	ab	6.25e-02(5.94e-02-6.29e-02)	a	5.36e-02(4.87e-02-5.81e-02)	a	2.25e-01(2.12e-01-2.50e-01)	a	2.28e-05	6.13e+01(1.25e+01-1.37e+02)	a	1.30e+02(8.76e+00-2.53e+02)	a	2.47e+01(1.92e+01-2.72e+01)	a	5.96e+00(9.24e-02-2.66e+01)	a	3.46e-02(2.72e-02-6.85e-02)	a	5.10e-02(3.19e-02-6.61e-02)	a	2.77e-02(2.40e-02-3.88e-02)	a	0.00933269	1.74e-02(1.53e-02-2.36e-02)	a	1.77e-02(1.71e-02-2.22e-02)	a	3.39e-02(2.88e-02-4.04e-02)	a	2.99e-02(2.82e-02-3.30e-02)	a	2.46e-02(2.04e-02-3.07e-02)	a	2.22e-02(2.09e-02-2.51e-02)	a	1.39e-02(1.28e-02-1.98e-02)	a	0.154409	1.95e-02(1.85e-02-2.33e-02)	a	2.90e-02(2.53e-02-3.06e-02)	a
totalVOCs	7.59e+03(7.49e+03-8.44e+03)	a	2.67e+04(2.65e+04-2.91e+04)	b	1.03e+04(9.99e+03-1.07e+04)	a	2.98e+04(2.82e+04-3.07e+04)	b	3.01e+04(2.87e+04-3.07e+04)	b	3.25e+04(3.22e+04-3.40e+04)	b	9.81e+03(9.37e+03-1.04e+04)	a	7.85e-11	4.52e+04(2.73e+04-6.71e+04)	ab	1.17e+05(3.67e+04-1.96e+05)	b	7.12e+04(4.16e+04-8.92e+04)	ab	4.87e+04(4.22e+04-5.49e+04)	ab	1.72e+04(1.06e+04-2.41e+04)	a	2.89e+04(1.89e+04-4.34e+04)	ab	2.91e+04(2.79e+04-3.25e+04)	ab	0.00499719	1.95e+03(1.73e+03-2.07e+03)	a	1.66e+04(1.58e+04-1.66e+04)	bc	3.19e+04(3.07e+04-3.32e+04)	d	3.30e+04(3.07e+04-3.71e+04)	d	2.36e+04(2.02e+04-2.66e+04)	cd	1.85e+04(1.81e+04-1.85e+04)	bc	1.08e+04(9.46e+03-1.10e+04)	ab	3.17e-07	1.63e+03(1.31e+03-1.73e+03)	a	4.14e+04(3.84e+04-4.23e+04)	e
[truncated: 41 more columns]
